# Supplementary material for: A Necroptosis-Related Gene Signature for Predicting Prognosis, Immune Landscape, and Therapy Sensitivity in Hepatocellular Carcinoma
Source: Research Square preprint supplement (doi:10.21203/rs.3.rs-1201594/v1), 2022-01-03
Supplement: Supplementary file 1 [file 01e9202181ea03a4324cf05e.xlsx]

## Sheet: diff
id	logFC	AveExpr	t	P.Value	adj.P.Val
TYRO3	1.7788	1.42562	20.7339	1.70587e-62	3.15466e-58
PLXNA1	1.51158	2.37719	19.4242	3.13714e-57	2.90075e-53
RCC2	1.46266	4.75819	19.1462	4.14168e-56	2.55307e-52
YEATS2	1.14944	2.2862	18.8265	8.07038e-55	3.73114e-51
MAPRE1	1.33543	5.36092	18.3711	5.55074e-53	1.76479e-49
RHNO1	1.28113	3.54776	18.3677	5.7258e-53	1.76479e-49
SPATS2	1.23235	2.79519	18.2505	1.70136e-52	4.49475e-49
MPZL1	1.33407	4.53191	18.0559	1.03761e-51	2.39857e-48
PHF21A	1.03671	2.24431	18.0416	1.18462e-51	2.43413e-48
CPSF6	1.02671	3.8557	17.7366	2.01318e-50	3.72297e-47
STX6	1.04333	3.02566	17.4964	1.87097e-49	2.88333e-46
CNOT11	1.0755	5.30808	17.4585	2.6612e-49	3.78566e-46
C15orf39	1.33803	3.21321	17.3429	7.7758e-49	1.02713e-45
SMARCD1	1.06751	4.16304	17.2562	1.7373e-48	1.92738e-45
GIT1	1.09076	3.83129	17.2541	1.77177e-48	1.92738e-45
CSNK2A1	1.04874	4.53367	16.9342	3.43331e-47	3.17461e-44
CASP2	1.14444	2.5918	16.8688	6.2866e-47	5.28446e-44
SPRING1	1.39318	2.69562	16.8367	8.46084e-47	6.80288e-44
NBEAL2	1.17892	2.46257	16.7648	1.64623e-46	1.26849e-43
PLAGL2	1.2078	2.39575	16.7178	2.54279e-46	1.80861e-43
PNMA1	1.55451	3.50154	16.6796	3.62072e-46	2.29428e-43
HDAC7	1.2754	2.9306	16.6783	3.66294e-46	2.29428e-43
RIT1	1.07984	3.28465	16.6774	3.69472e-46	2.29428e-43
NAA40	1.13917	2.65191	16.6766	3.72187e-46	2.29428e-43
PTBP3	1.14755	3.92254	16.6429	5.08042e-46	3.03072e-43
RNF24	1.11717	1.79266	16.6245	6.02385e-46	3.48122e-43
FAM117B	1.20311	1.75015	16.5938	8.00262e-46	4.35272e-43
TMEM51	1.89361	2.71534	16.5742	9.595e-46	5.06972e-43
GTSE1	1.59227	1.81295	16.5577	1.11669e-45	5.58134e-43
SOGA1	1.2239	1.88657	16.5042	1.8304e-45	8.90777e-43
GAS2L3	1.24406	1.53138	16.4173	4.08492e-45	1.79863e-42
UBA2	1.06784	4.86366	16.4145	4.19287e-45	1.80323e-42
MTMR2	1.17624	2.35035	16.4048	4.5826e-45	1.92605e-42
TMEM184B	1.16942	4.2145	16.3898	5.26461e-45	2.12769e-42
C2CD5	1.10131	2.93024	16.3768	5.93415e-45	2.28626e-42
SPINDOC	1.38543	2.94891	16.2788	1.46562e-44	5.21224e-42
PRKCI	1.05017	2.90215	16.2425	2.04925e-44	7.01794e-42
TMEM201	1.04297	2.22435	16.2341	2.21309e-44	7.30832e-42
RBM12	1.00158	3.76389	16.1979	3.08962e-44	9.68414e-42
CNOT6	1.06803	2.82616	16.1858	3.45614e-44	1.06524e-41
MARK2	1.03954	3.54925	16.1616	4.32029e-44	1.28863e-41
PELI1	1.41975	3.26897	16.122	6.21667e-44	1.79633e-41
KIF5B	1.09797	5.00321	16.1122	6.80401e-44	1.93579e-41
CDK16	1.1159	4.24892	16.107	7.13933e-44	2.00042e-41
PIGS	1.22242	3.15343	16.0979	7.76648e-44	2.14367e-41
ZNF532	1.23271	1.54507	16.0801	9.14694e-44	2.48756e-41
FAM222B	1.02318	3.34975	16.0646	1.05525e-43	2.81067e-41
NUP62	1.04778	4.20661	16.0637	1.0639e-43	2.81067e-41
NCAPD2	1.45836	3.45473	16.0618	1.08231e-43	2.81903e-41
ANKRD52	1.21028	3.26254	16.0445	1.26909e-43	3.25963e-41
LIMK1	1.38355	2.6727	16.0081	1.77525e-43	4.45879e-41
MMD	1.57282	3.62386	16.0062	1.80609e-43	4.45879e-41
PDE7A	1.11874	2.02061	15.9829	2.23874e-43	5.37674e-41
XXYLT1	1.02258	1.8865	15.9627	2.69523e-43	6.30922e-41
ABCC10	1.02762	2.3874	15.9351	3.47351e-43	8.02945e-41
PKM	2.19871	4.91399	15.9016	4.72504e-43	1.06561e-40
DYRK2	1.18923	2.36624	15.8994	4.82162e-43	1.07429e-40
SELENON	1.14791	4.99912	15.869	6.3774e-43	1.37136e-40
BCL9	1.42047	3.02675	15.8581	7.04795e-43	1.48111e-40
CDCA4	1.26181	2.79029	15.8476	7.76162e-43	1.59484e-40
CSRNP2	1.02489	2.8155	15.839	8.4033e-43	1.70772e-40
ZBED4	1.02519	2.61962	15.81	1.09678e-42	2.20465e-40
FGD6	1.27425	1.89375	15.8003	1.19851e-42	2.35789e-40
SALL2	1.61593	1.32612	15.7956	1.25219e-42	2.43755e-40
ARHGEF2	1.44832	2.94718	15.7918	1.29653e-42	2.49757e-40
DEPDC1B	1.67871	1.85808	15.7866	1.35965e-42	2.59217e-40
NSD2	1.1561	2.36075	15.7817	1.42197e-42	2.68331e-40
METTL9	1.05801	3.15847	15.7702	1.5806e-42	2.95252e-40
ILF3	1.01259	4.98715	15.7679	1.61467e-42	2.986e-40
PHIP	1.02061	2.31054	15.7591	1.75036e-42	3.17347e-40
CBFA2T2	1.02025	2.53493	15.7234	2.42861e-42	4.36042e-40
TBC1D22B	1.00704	2.86458	15.706	2.84987e-42	5.01929e-40
AACS	1.01256	1.70933	15.6899	3.30311e-42	5.76267e-40
LMNB2	1.37001	3.54854	15.6884	3.35016e-42	5.79014e-40
FKBP9	1.11571	4.34379	15.6632	4.22046e-42	7.16046e-40
ECT2	1.64501	2.54068	15.6227	6.12053e-42	1.0106e-39
CSNK1E	1.05615	4.18469	15.5954	7.85896e-42	1.24219e-39
DDR1	2.17078	2.81459	15.5764	9.3544e-42	1.44159e-39
CEP55	1.54282	1.77112	15.5696	9.95494e-42	1.52146e-39
DNMT3A	1.18153	2.52966	15.5613	1.07393e-41	1.62788e-39
RBL1	1.10828	1.70166	15.5243	1.50728e-41	2.26618e-39
SLC27A5	-2.52605	6.08044	-15.5129	1.67303e-41	2.45888e-39
TEAD2	1.77905	3.79433	15.5128	1.67533e-41	2.45888e-39
NCK2	1.9059	3.77631	15.4831	2.1988e-41	3.05732e-39
PLEKHG2	1.10745	2.2254	15.4723	2.4267e-41	3.32421e-39
ZDHHC13	1.13967	1.1922	15.4635	2.62983e-41	3.57599e-39
CHMP3	1.0052	3.39932	15.4244	3.76132e-41	5.03332e-39
LZTS2	1.17714	3.63483	15.4209	3.88405e-41	5.1216e-39
GPD2	1.08569	2.27638	15.4002	4.69536e-41	6.07212e-39
VEZT	1.03848	3.25723	15.3921	5.05369e-41	6.49013e-39
SERPINH1	1.41476	5.43738	15.3862	5.33538e-41	6.80464e-39
ATN1	1.13975	4.95473	15.3769	5.80982e-41	7.25952e-39
SMARCA4	1.01952	4.16941	15.3507	7.3782e-41	9.03609e-39
BUB1B	1.55499	1.94759	15.3478	7.58056e-41	9.22284e-39
DCXR	-1.92922	8.92296	-15.3343	8.5712e-41	1.02927e-38
BAZ2A	1.11517	3.62262	15.315	1.02295e-40	1.20493e-38
KIF23	1.44016	1.65819	15.265	1.61479e-40	1.84335e-38
MFSD14B	1.11954	4.10066	15.2554	1.76267e-40	1.98103e-38
SEPTIN2	1.15584	5.47601	15.2552	1.76612e-40	1.98103e-38
VASP	1.07351	5.33076	15.2551	1.76753e-40	1.98103e-38
CENPF	1.67902	2.34676	15.251	1.83524e-40	2.04453e-38
PRR12	1.12602	2.96995	15.2446	1.94545e-40	2.1415e-38
TUG1	1.02338	4.78071	15.2097	2.67481e-40	2.90972e-38
PLEKHB2	1.17529	3.73276	15.2062	2.76249e-40	2.98753e-38
ZMIZ1	1.28763	3.41523	15.196	3.0301e-40	3.23906e-38
TMEM65	1.28981	2.42929	15.1918	3.1493e-40	3.34713e-38
DVL3	1.01779	4.71168	15.1707	3.81904e-40	4.01281e-38
SLC39A10	1.23443	2.10566	15.1398	5.06203e-40	5.2591e-38
FNBP4	1.00568	3.29172	15.1315	5.4598e-40	5.60933e-38
SOAT1	1.09084	3.63052	15.1305	5.50901e-40	5.62862e-38
SCMH1	1.07125	3.25523	15.1174	6.20949e-40	6.30945e-38
KIF20B	1.03384	1.57674	15.1137	6.42359e-40	6.49133e-38
DCAF16	1.19083	2.81013	15.0957	7.56805e-40	7.56519e-38
TPM4	1.53189	5.21776	15.0771	8.96442e-40	8.83759e-38
ANLN	1.69646	2.26311	15.0472	1.17697e-39	1.14556e-37
LIN9	1.04305	1.70229	15.0378	1.28248e-39	1.23525e-37
MFSD10	1.47153	4.10222	15.0328	1.34124e-39	1.28515e-37
TCF3	1.11933	3.84002	15.03	1.37598e-39	1.30678e-37
SGO2	1.11159	1.41706	15.0282	1.39937e-39	1.32034e-37
ADNP	1.00322	4.45607	15.0235	1.46066e-39	1.37117e-37
RAI1	1.17622	2.18944	15.0117	1.6264e-39	1.51904e-37
BAK1	1.33132	4.04058	14.9764	2.24096e-39	2.04148e-37
FBLIM1	1.69599	3.51258	14.9425	3.05285e-39	2.75397e-37
IFT52	1.06934	3.53202	14.9411	3.09002e-39	2.76057e-37
CENPO	1.13675	1.8926	14.9353	3.25678e-39	2.89556e-37
PEA15	1.09132	6.64183	14.9161	3.8813e-39	3.38571e-37
ANKRD13D	1.00645	2.62766	14.9082	4.16717e-39	3.6011e-37
UBAP2L	1.09215	5.16156	14.9024	4.39405e-39	3.7795e-37
TMEM87B	1.00106	2.90239	14.8954	4.6826e-39	4.00904e-37
ZNF618	1.08236	2.12563	14.8855	5.12506e-39	4.3476e-37
TMEM43	1.04552	4.60192	14.8763	5.56919e-39	4.70278e-37
CKAP4	1.35063	6.19008	14.871	5.84451e-39	4.87516e-37
WDHD1	1.08105	1.38219	14.8239	8.96727e-39	7.26045e-37
NAP1L1	1.16331	4.59466	14.7828	1.30173e-38	1.01147e-36
CORO1C	1.03482	4.7324	14.7696	1.46807e-38	1.13121e-36
NCAPH	1.52463	2.2327	14.7514	1.73054e-38	1.31159e-36
B4GALT5	1.25202	4.50434	14.7398	1.92379e-38	1.43454e-36
NDRG3	1.07809	4.2234	14.7345	2.01713e-38	1.48617e-36
POGK	1.14984	3.81422	14.7205	2.29144e-38	1.66833e-36
CBX1	1.15928	4.6554	14.7174	2.35528e-38	1.70809e-36
INCENP	1.27254	2.50479	14.6255	5.41597e-38	3.74417e-36
SOX4	2.10753	3.3856	14.6176	5.81668e-38	3.9988e-36
KDM5C	1.01036	4.21609	14.5967	7.02829e-38	4.7601e-36
GLS	1.57724	3.10239	14.5963	7.05277e-38	4.7601e-36
NUP205	1.09502	3.205	14.5767	8.428e-38	5.62668e-36
POLA1	1.04555	2.14845	14.5458	1.11437e-37	7.33383e-36
SINHCAF	1.3902	2.32022	14.5388	1.18692e-37	7.7288e-36
PRKCD	1.25145	3.83747	14.5003	1.68097e-37	1.06459e-35
UBE2Q2	1.4296	3.35325	14.4881	1.87657e-37	1.17241e-35
POLD3	1.00562	2.50933	14.4829	1.967e-37	1.22477e-35
VEZF1	1.01416	3.67894	14.4781	2.05405e-37	1.27042e-35
CD276	1.05366	4.68914	14.4665	2.28173e-37	1.40653e-35
CD2AP	1.06681	4.0414	14.4562	2.50289e-37	1.53265e-35
KIF11	1.3896	2.23186	14.4451	2.76591e-37	1.67705e-35
SMTN	1.02821	2.91599	14.437	2.97708e-37	1.79333e-35
FAM102B	1.04833	1.61678	14.4207	3.44927e-37	2.07102e-35
IFNGR2	1.15871	5.23711	14.4098	3.80483e-37	2.26247e-35
CLSTN1	1.54222	4.37488	14.4068	3.91028e-37	2.31772e-35
COLCA2	1.59336	1.75734	14.4038	4.01712e-37	2.35837e-35
CHD3	1.51844	2.82321	14.38	4.97799e-37	2.85895e-35
OSBPL3	1.11001	1.76226	14.374	5.25733e-37	3.01002e-35
DVL2	1.02779	3.28506	14.3545	6.26654e-37	3.52241e-35
ARL6IP6	1.1071	2.37763	14.3497	6.54051e-37	3.66526e-35
BUB1	1.40221	1.93304	14.3485	6.61404e-37	3.69527e-35
TCTN2	1.16963	1.48287	14.329	7.88567e-37	4.33199e-35
SLC41A1	1.45195	2.46862	14.3289	7.89424e-37	4.33199e-35
ABL1	1.08852	4.01182	14.3268	8.04446e-37	4.40137e-35
MGAT4A	1.04379	2.82322	14.2939	1.08125e-36	5.81265e-35
FNDC3B	1.12951	3.84717	14.2847	1.17488e-36	6.26867e-35
ACTL6A	1.10582	4.02379	14.2842	1.18023e-36	6.26867e-35
ITPR3	1.75899	1.45493	14.284	1.18198e-36	6.26867e-35
KIF18B	1.53959	1.88989	14.2761	1.26896e-36	6.68573e-35
PYGO2	1.0073	5.19623	14.2602	1.46516e-36	7.61777e-35
SMARCC1	1.00842	4.33025	14.26	1.46806e-36	7.61777e-35
BCL7A	1.00484	2.85501	14.2598	1.47058e-36	7.61777e-35
FUBP1	1.08602	4.00858	14.2575	1.50135e-36	7.73787e-35
TOPBP1	1.12643	3.17712	14.2574	1.50213e-36	7.73787e-35
B3GALNT1	1.0824	1.29207	14.255	1.5346e-36	7.83958e-35
MSI2	1.02643	2.06425	14.241	1.74184e-36	8.75324e-35
EHBP1L1	1.03436	3.56631	14.2242	2.02513e-36	1.00404e-34
FZD1	1.39054	1.71409	14.2124	2.2514e-36	1.11027e-34
TLCD3A	1.28214	2.20446	14.2022	2.46776e-36	1.20413e-34
WSB1	1.14061	3.52352	14.1972	2.58269e-36	1.2552e-34
CHAF1B	1.38346	1.84498	14.1796	3.02293e-36	1.45203e-34
NFE2L3	1.43219	2.18255	14.1658	3.42287e-36	1.62723e-34
BMF	1.63467	2.67003	14.155	3.77202e-36	1.77949e-34
DNMT1	1.32693	3.32142	14.1498	3.95223e-36	1.85504e-34
MAP4K4	1.05445	4.49287	14.1244	4.96485e-36	2.30691e-34
PACS1	1.0796	3.55456	14.124	4.98489e-36	2.31042e-34
KIF18A	1.11184	1.18649	14.1185	5.23645e-36	2.40292e-34
MAP3K1	1.03633	2.722	14.1172	5.29774e-36	2.42009e-34
BTBD3	1.14785	2.88202	14.1171	5.30005e-36	2.42009e-34
GINS1	1.53909	2.4321	14.1118	5.55863e-36	2.5257e-34
TMEM165	1.02659	3.27873	14.1104	5.62927e-36	2.55152e-34
MCM8	1.10222	1.82579	14.1079	5.75837e-36	2.60366e-34
YWHAZ	1.1665	6.41973	14.1009	6.13102e-36	2.76539e-34
CIP2A	1.18356	1.38524	14.0903	6.7452e-36	3.01302e-34
ATXN7L3	1.00894	4.39322	14.0854	7.04359e-36	3.13873e-34
TULP3	1.03135	3.3551	14.0763	7.64769e-36	3.39973e-34
SAPCD2	1.35855	1.33001	14.0748	7.7475e-36	3.43584e-34
ASAP1	1.2545	2.96595	14.0674	8.28003e-36	3.6285e-34
SPIN1	1.2244	4.1473	14.0623	8.66754e-36	3.7804e-34
NFYA	1.09463	3.87895	14.0505	9.63419e-36	4.18228e-34
NCOR2	1.01701	3.93974	14.0343	1.11401e-35	4.75703e-34
IFFO2	1.13777	2.45467	14.0314	1.14366e-35	4.862e-34
ELF4	1.39562	1.83631	14.0294	1.16456e-35	4.93948e-34
DBN1	1.81286	3.27362	14.0253	1.20805e-35	5.08894e-34
CDK19	1.08148	2.45404	13.9868	1.70508e-35	7.0384e-34
SPRED1	1.19578	2.07581	13.982	1.77962e-35	7.29722e-34
LAMC1	1.45944	5.23798	13.9697	1.9869e-35	8.11122e-34
RASSF3	1.4631	3.94772	13.9675	2.02654e-35	8.23668e-34
RNF44	1.09939	3.7748	13.9621	2.12613e-35	8.60363e-34
POLD1	1.11095	3.49692	13.9615	2.13811e-35	8.63321e-34
NCDN	1.01545	3.0267	13.958	2.20609e-35	8.88828e-34
ARHGAP18	1.08709	2.65748	13.9505	2.36069e-35	9.46992e-34
HOMER3	1.49972	2.96092	13.9466	2.44373e-35	9.78178e-34
ALDH3B1	1.25319	2.46136	13.938	2.63815e-35	1.04694e-33
PTPN12	1.06405	4.12644	13.9337	2.74183e-35	1.08575e-33
CAMSAP2	1.08331	2.89668	13.916	3.21172e-35	1.26371e-33
IARS1	1.07331	4.3296	13.8781	4.50649e-35	1.75819e-33
SMAD5	1.06428	3.83821	13.8652	5.06025e-35	1.9431e-33
LRRC8B	1.13846	1.67528	13.8576	5.41396e-35	2.0686e-33
PLK1	1.6303	2.48247	13.8567	5.45686e-35	2.0807e-33
STK17A	1.07513	3.21749	13.8527	5.65881e-35	2.15326e-33
TOP2A	1.99498	3.66954	13.8332	6.73068e-35	2.54021e-33
UNC119	1.12807	3.29209	13.8319	6.81009e-35	2.56495e-33
MCM6	1.3944	4.123	13.8081	8.42042e-35	3.13949e-33
SIPA1L3	1.19799	2.7919	13.8032	8.80343e-35	3.26256e-33
TMEM185B	1.00751	3.79223	13.7943	9.52885e-35	3.49519e-33
E2F3	1.17163	2.79155	13.7939	9.56098e-35	3.49519e-33
PAK4	1.01023	3.89719	13.7806	1.07665e-34	3.86613e-33
BCOR	1.12509	2.92634	13.772	1.16267e-34	4.16691e-33
MYRF	1.49883	3.58173	13.7584	1.31181e-34	4.63849e-33
RNF145	1.16826	3.56552	13.7333	1.64074e-34	5.76848e-33
MARCKS	1.48394	5.41348	13.7107	2.0078e-34	6.96626e-33
FANCI	1.26283	2.2128	13.7096	2.02655e-34	7.01818e-33
COL9A2	1.55713	1.32318	13.7084	2.04803e-34	7.07931e-33
CENPE	1.03734	1.20339	13.6979	2.2487e-34	7.72961e-33
STIL	1.00623	1.30613	13.6947	2.31462e-34	7.93835e-33
EZH2	1.25828	2.79639	13.6945	2.31802e-34	7.93835e-33
MSH2	1.10977	3.28268	13.6863	2.49506e-34	8.52886e-33
AC099850.3	1.66479	2.10636	13.6796	2.64661e-34	8.99702e-33
LDB1	1.12956	4.11005	13.6766	2.71837e-34	9.20711e-33
AFAP1	1.10585	1.53353	13.6743	2.77608e-34	9.36826e-33
NIBAN2	1.5923	4.62825	13.6459	3.5732e-34	1.19709e-32
FOXM1	1.74089	2.90683	13.6448	3.60787e-34	1.20652e-32
GLIS2	1.68171	2.50324	13.6392	3.79111e-34	1.26283e-32
ASPDH	-2.36035	5.05572	-13.6366	3.882e-34	1.28887e-32
ENAH	1.35073	3.58884	13.6309	4.08498e-34	1.35141e-32
CRMP1	1.34339	1.50374	13.6259	4.26743e-34	1.40924e-32
FANCD2	1.10949	1.61949	13.6239	4.34647e-34	1.43278e-32
DLGAP5	1.46429	2.10057	13.6144	4.72735e-34	1.54731e-32
BCORL1	1.10073	2.24451	13.6125	4.8086e-34	1.56887e-32
MYLIP	1.15617	2.63507	13.5974	5.4996e-34	1.77185e-32
CAD	1.08763	3.35372	13.5912	5.81291e-34	1.8444e-32
DHX9	1.00942	5.3863	13.5872	6.02007e-34	1.90306e-32
RACGAP1	1.3652	3.05559	13.5842	6.18554e-34	1.94539e-32
SEMA4C	1.05546	3.52688	13.5771	6.58423e-34	2.06727e-32
FAM118A	1.08795	2.48125	13.5769	6.59912e-34	2.06843e-32
PRR11	1.3888	2.02578	13.5634	7.43914e-34	2.30053e-32
SPDL1	1.02643	2.11089	13.5577	7.82274e-34	2.40709e-32
MFSD6	1.29902	2.2922	13.5462	8.66418e-34	2.644e-32
ACSM2A	-2.1577	5.1904	-13.5394	9.20515e-34	2.79213e-32
TTLL4	1.36718	2.79712	13.5097	1.19764e-33	3.57224e-32
RERE	1.03942	3.47236	13.5086	1.20918e-33	3.59687e-32
IKBKE	1.38819	2.23087	13.5086	1.20978e-33	3.59687e-32
ZNF664	1.00017	5.03984	13.4861	1.47718e-33	4.32923e-32
NEMP1	1.15499	2.65342	13.4827	1.52165e-33	4.45251e-32
ARHGAP11A	1.24644	1.93803	13.4805	1.55125e-33	4.53195e-32
ADCY6	1.00699	3.29006	13.4796	1.564e-33	4.56199e-32
NFATC2	1.15205	2.1653	13.4785	1.57947e-33	4.59987e-32
STX3	1.23008	3.11793	13.4644	1.79019e-33	5.14868e-32
CKAP2L	1.23559	1.60806	13.4629	1.81388e-33	5.20065e-32
NEK2	1.58638	2.61779	13.4623	1.82347e-33	5.22005e-32
SUSD1	1.04641	1.89635	13.4605	1.85304e-33	5.28015e-32
NUF2	1.54211	2.24834	13.4568	1.91442e-33	5.43831e-32
PLXNA3	1.20542	1.90687	13.4563	1.92359e-33	5.45599e-32
NRM	1.45324	3.8425	13.455	1.94576e-33	5.51042e-32
PRRC2C	1.07923	4.26645	13.4518	2.00056e-33	5.6483e-32
KIF20A	1.60001	2.59018	13.4484	2.06321e-33	5.79862e-32
RGS19	1.12638	3.36043	13.4363	2.29463e-33	6.43923e-32
ZNF292	1.01462	1.84342	13.4357	2.30708e-33	6.46437e-32
PDLIM7	1.16856	3.53063	13.4249	2.53885e-33	7.06029e-32
RNF144A	1.1473	1.62561	13.4205	2.64112e-33	7.33366e-32
TSPAN3	1.09512	4.33815	13.412	2.84653e-33	7.86858e-32
PHF19	1.13751	2.34252	13.4016	3.12011e-33	8.54817e-32
PPP1R9B	1.16024	4.1634	13.3995	3.18008e-33	8.69958e-32
IMPDH1	1.52934	2.92211	13.3951	3.30677e-33	9.00619e-32
KIF14	1.08265	1.29424	13.3931	3.36334e-33	9.14681e-32
KNTC1	1.17536	1.79099	13.3875	3.53646e-33	9.60348e-32
KIAA1522	1.29188	4.84601	13.3789	3.81319e-33	1.02945e-31
DNAJC9	1.07122	2.7807	13.3707	4.10306e-33	1.10288e-31
NOTCH1	1.18587	2.87311	13.367	4.23915e-33	1.13615e-31
ITGA5	1.25057	5.03465	13.3615	4.44798e-33	1.18868e-31
NRSN2	1.94764	2.94645	13.3576	4.60595e-33	1.22912e-31
ATP1A1	1.34719	7.18429	13.3501	4.92096e-33	1.30357e-31
YWHAQ	1.04612	6.59371	13.3489	4.97259e-33	1.31369e-31
MMP14	1.63864	5.13891	13.3353	5.6076e-33	1.47094e-31
WDR62	1.03323	1.38394	13.3288	5.93826e-33	1.54889e-31
SKIL	1.09617	3.23232	13.3204	6.39483e-33	1.65167e-31
PHLDB1	1.01126	1.28769	13.3098	7.02746e-33	1.79998e-31
ZSWIM4	1.02794	1.9663	13.2947	8.0259e-33	2.03598e-31
UNC119B	1.12349	2.87316	13.2904	8.3328e-33	2.1023e-31
LRRC1	1.59227	2.31734	13.2895	8.4048e-33	2.11469e-31
PLXND1	1.10013	4.29285	13.2854	8.71467e-33	2.18671e-31
TSPAN15	1.69224	3.52304	13.2809	9.06595e-33	2.26563e-31
MMP11	1.83638	2.56281	13.2758	9.48454e-33	2.36235e-31
HMGA1	1.5874	6.11597	13.2709	9.90272e-33	2.45155e-31
ZBTB12	1.28488	2.22699	13.2686	1.01086e-32	2.49916e-31
ORAI2	1.01715	1.42556	13.262	1.07105e-32	2.63058e-31
IQGAP1	1.27867	3.0126	13.2432	1.26417e-32	3.08014e-31
MYBL2	2.19858	3.61061	13.2195	1.55801e-32	3.74186e-31
FHL3	1.15096	3.83664	13.2148	1.62296e-32	3.88272e-31
ABCC1	1.47824	2.24913	13.2125	1.65708e-32	3.95921e-31
KIF15	1.17783	1.32201	13.2064	1.74793e-32	4.14949e-31
CALU	1.12246	5.52711	13.1985	1.87424e-32	4.43794e-31
SLC9A1	1.01168	2.19188	13.193	1.96696e-32	4.61611e-31
UHRF1	1.41107	1.76219	13.1885	2.04571e-32	4.78877e-31
MIS18A	1.05366	3.49591	13.1867	2.07867e-32	4.85978e-31
SUCO	1.04145	3.59423	13.1856	2.09944e-32	4.90213e-31
CDK1	1.61043	3.05578	13.1813	2.17996e-32	5.08374e-31
MCM3	1.34104	5.45031	13.178	2.2447e-32	5.22154e-31
PPT1	1.12133	5.33521	13.1737	2.33231e-32	5.4009e-31
MKI67	1.54745	2.5272	13.1575	2.68769e-32	6.18972e-31
AGRN	1.38302	5.04195	13.1569	2.70349e-32	6.21836e-31
ZNF761	1.15034	2.246	13.1551	2.74493e-32	6.30584e-31
SLC39A6	1.19808	4.16211	13.1536	2.7818e-32	6.38262e-31
CCNF	1.10693	2.02959	13.1466	2.96025e-32	6.7585e-31
ADAM17	1.13488	2.14417	13.141	3.10856e-32	7.07092e-31
PRC1	1.51741	2.96253	13.129	3.45479e-32	7.82e-31
WNK2	1.78846	1.10888	13.1283	3.4752e-32	7.85658e-31
UTRN	1.14608	2.99922	13.127	3.51649e-32	7.93055e-31
EVC2	1.03574	0.845347	13.1245	3.59475e-32	8.08731e-31
ATP2B1	1.05667	3.10507	13.1199	3.74111e-32	8.39616e-31
HJURP	1.48458	2.37881	13.1169	3.84255e-32	8.59253e-31
LHFPL2	1.26085	2.09332	13.1154	3.89239e-32	8.69348e-31
KHDC4	1.03442	3.60583	13.0932	4.7325e-32	1.04437e-30
LBR	1.08111	5.23686	13.0918	4.79099e-32	1.05602e-30
NREP	1.44374	3.17688	13.0652	6.05173e-32	1.32353e-30
CDCA2	1.09022	1.23013	13.0651	6.05478e-32	1.32353e-30
ATP13A2	1.04976	3.15929	13.0637	6.12931e-32	1.33824e-30
KRBA1	1.09377	1.46173	13.0581	6.43828e-32	1.40239e-30
NT5DC2	1.71333	3.31084	13.0508	6.86742e-32	1.49411e-30
SLC6A6	1.529	1.67382	13.041	7.48385e-32	1.61375e-30
SH3BP1	1.2206	1.84114	13.0409	7.48715e-32	1.61375e-30
P2RX4	1.03952	3.18365	13.0362	7.80049e-32	1.67738e-30
CDC6	1.50838	2.59826	13.0333	8.00031e-32	1.71437e-30
CBX5	1.04513	3.18831	13.0285	8.3461e-32	1.78227e-30
SRC	1.61095	3.34348	13.0255	8.57196e-32	1.81906e-30
TPX2	1.70471	4.05039	13.0145	9.43965e-32	1.99506e-30
TTK	1.31684	1.72828	13.0126	9.59287e-32	2.02282e-30
MYADM	1.234	5.14742	13.01	9.82003e-32	2.06601e-30
FUT4	1.32564	1.50412	13.0037	1.03777e-31	2.17591e-30
KIF3C	1.11508	1.1567	13.0015	1.05743e-31	2.21211e-30
KIF2C	1.60705	2.58699	12.9987	1.08432e-31	2.2658e-30
TMEM132A	1.64304	1.87862	12.9934	1.13539e-31	2.3645e-30
MAP4K3	1.06155	3.28407	12.9915	1.15451e-31	2.40161e-30
VCL	1.0729	3.41423	12.9908	1.16159e-31	2.41363e-30
ACVR1	1.06384	3.85034	12.9872	1.19907e-31	2.47758e-30
NUP210	1.15948	4.10841	12.9803	1.27304e-31	2.60424e-30
UNC5B	1.35752	2.34634	12.9678	1.42102e-31	2.89415e-30
FANCE	1.10427	2.13299	12.9367	1.86598e-31	3.75082e-30
LIG1	1.02691	3.57171	12.9349	1.89424e-31	3.8035e-30
CYP8B1	-3.4521	5.65831	-12.9306	1.96675e-31	3.93628e-30
PIAS3	1.08162	2.75618	12.9197	2.16381e-31	4.30272e-30
SNHG1	1.10144	3.74776	12.9186	2.18563e-31	4.34145e-30
CDCA8	1.52872	2.95726	12.9129	2.29616e-31	4.54634e-30
FBXO5	1.02347	1.71758	12.91	2.35623e-31	4.66029e-30
TRIP13	1.38683	2.01978	12.8796	3.07347e-31	6.0082e-30
MARCKSL1	1.548	6.26607	12.8675	3.41496e-31	6.64766e-30
MAPK13	1.91283	2.09779	12.8615	3.5999e-31	6.97098e-30
GTPBP2	1.05468	4.20813	12.8578	3.71829e-31	7.1777e-30
CDC42SE1	1.05264	4.8447	12.8216	5.09719e-31	9.63827e-30
IVNS1ABP	1.05663	4.42037	12.8098	5.65246e-31	1.06339e-29
MAD2L1	1.17004	2.04805	12.7996	6.17654e-31	1.15377e-29
MCM10	1.12967	1.33623	12.795	6.42846e-31	1.19961e-29
RFC4	1.17752	3.66694	12.7925	6.57059e-31	1.22121e-29
PRRC2A	1.04789	5.36215	12.7911	6.65265e-31	1.23398e-29
CHEK1	1.01866	1.91512	12.7882	6.8227e-31	1.26298e-29
CDK2AP1	1.06536	4.24749	12.7761	7.57891e-31	1.39738e-29
SYNJ2	1.11787	2.56486	12.7705	7.9614e-31	1.46352e-29
KCTD17	1.77361	3.00862	12.7618	8.58837e-31	1.57252e-29
CDCA7	1.59768	1.26105	12.7577	8.89415e-31	1.62209e-29
VHL	1.1094	3.69338	12.753	9.27256e-31	1.68611e-29
CDK4	1.17481	4.95631	12.7493	9.57288e-31	1.7373e-29
LAMB1	1.60451	4.24623	12.7456	9.8875e-31	1.79089e-29
PAPLN	1.75834	1.83274	12.7255	1.17698e-30	2.1132e-29
FANCG	1.04334	2.92501	12.7035	1.42574e-30	2.5255e-29
PPP1R9A	1.02421	0.888972	12.7	1.47021e-30	2.60179e-29
NUSAP1	1.53628	4.07623	12.6784	1.77363e-30	3.09724e-29
MEX3A	1.21879	1.6333	12.6772	1.79217e-30	3.12665e-29
ZNF710	1.15204	2.57132	12.6734	1.85178e-30	3.22458e-29
MCM2	1.59831	3.82729	12.6575	2.12668e-30	3.67902e-29
CMTM3	1.27732	3.45005	12.653	2.21127e-30	3.79693e-29
LINC00205	1.03088	1.93892	12.6436	2.39965e-30	4.10896e-29
HELLS	1.05436	1.41269	12.6364	2.55283e-30	4.35111e-29
MCM4	1.33381	3.99706	12.6329	2.63144e-30	4.48095e-29
CENPA	1.4177	2.04048	12.6302	2.69508e-30	4.58089e-29
RUSC1	1.05454	3.38816	12.6293	2.71666e-30	4.61333e-29
SLC1A5	1.85156	3.58591	12.6087	3.24756e-30	5.46871e-29
HPR	-2.50829	7.85989	-12.5925	3.73812e-30	6.26169e-29
MFAP2	1.43287	1.23305	12.5902	3.81292e-30	6.3812e-29
SFXN3	1.25262	2.84644	12.5789	4.2062e-30	7.00137e-29
C7orf31	1.0143	1.37657	12.5786	4.21647e-30	7.01215e-29
PIMREG	1.22443	1.06633	12.5782	4.22884e-30	7.02641e-29
EXO1	1.19986	1.80289	12.5722	4.45757e-30	7.36017e-29
ABHD3	1.13839	4.34544	12.5703	4.52781e-30	7.46281e-29
ABR	1.13188	1.85074	12.5555	5.14823e-30	8.42533e-29
LPCAT4	1.10961	2.02778	12.5536	5.2367e-30	8.54742e-29
TRIP10	1.06093	3.60801	12.5432	5.72918e-30	9.27756e-29
CMTM4	1.08449	2.10408	12.5312	6.35406e-30	1.02357e-28
ACLY	1.03259	5.48668	12.5291	6.47048e-30	1.04051e-28
TUBA1C	1.22009	4.2739	12.5147	7.33063e-30	1.17068e-28
MELK	1.45413	2.45616	12.513	7.43748e-30	1.1857e-28
LMNB1	1.49313	3.82817	12.508	7.76341e-30	1.23447e-28
TACC3	1.3381	3.31594	12.506	7.90047e-30	1.25411e-28
KDM5B	1.11616	2.77349	12.5015	8.21504e-30	1.29958e-28
CTNND2	1.96301	1.24454	12.4897	9.09529e-30	1.43026e-28
DRAM1	1.06519	3.1507	12.4728	1.05292e-29	1.64456e-28
CCNB2	1.55714	2.98158	12.4667	1.10987e-29	1.72914e-28
DSG2	1.86483	3.4644	12.4623	1.15235e-29	1.79251e-28
ACSM2B	-1.94206	5.70566	-12.4474	1.31144e-29	2.02442e-28
RTL6	1.22107	1.89801	12.4315	1.50309e-29	2.30869e-28
KIFC1	1.64579	3.25054	12.428	1.54924e-29	2.37226e-28
CDC7	1.12206	1.88088	12.428	1.54961e-29	2.37226e-28
GMIP	1.01691	2.73333	12.4222	1.62932e-29	2.48811e-28
MTCL1	1.09672	0.9404	12.4136	1.75505e-29	2.66909e-28
ARHGEF17	1.13481	2.19339	12.4063	1.86839e-29	2.83447e-28
TROAP	1.4959	2.41795	12.4042	1.90313e-29	2.88244e-28
CSPP1	1.01991	2.37797	12.404	1.90557e-29	2.88378e-28
SLC7A1	1.36015	1.69409	12.3921	2.11199e-29	3.16251e-28
HILPDA	1.22887	2.7123	12.3901	2.14827e-29	3.21424e-28
FEN1	1.15748	4.78146	12.3794	2.35677e-29	3.50916e-28
TUFT1	1.11087	3.21581	12.3615	2.74983e-29	4.07473e-28
TOR4A	1.27263	2.09736	12.3611	2.75909e-29	4.07879e-28
TPR	1.01215	4.11801	12.3568	2.86245e-29	4.21796e-28
PRKX	1.2152	1.70762	12.3555	2.89439e-29	4.26162e-28
PLIN3	1.01004	4.94349	12.3479	3.0906e-29	4.53967e-28
USP1	1.03941	3.72415	12.3314	3.56136e-29	5.20223e-28
GAL3ST1	2.32865	2.68248	12.3186	3.9773e-29	5.77787e-28
LPCAT1	1.405	3.66143	12.3147	4.11146e-29	5.96339e-28
GLYAT	-2.8349	4.39502	-12.3121	4.20375e-29	6.09247e-28
FRAS1	1.31046	0.729108	12.3097	4.29057e-29	6.20856e-28
CYRIB	1.02634	3.29273	12.3091	4.31394e-29	6.23751e-28
CHML	1.27766	2.33727	12.3079	4.35898e-29	6.29771e-28
RIBC2	1.21896	1.20647	12.3036	4.52259e-29	6.51985e-28
EPB41L2	1.16065	2.8208	12.3036	4.52332e-29	6.51985e-28
P3H4	1.32546	3.03838	12.3003	4.65332e-29	6.70201e-28
PIP5K1A	1.08155	4.11438	12.2989	4.7092e-29	6.76277e-28
PTK7	1.56049	1.69144	12.2986	4.72059e-29	6.77252e-28
JAG1	1.41075	3.14432	12.2958	4.83839e-29	6.93078e-28
ADAM9	1.43768	3.38644	12.2948	4.87759e-29	6.97612e-28
SLC10A3	1.05021	3.8082	12.2946	4.88875e-29	6.98147e-28
GRAMD1A	1.3087	4.08605	12.292	4.99712e-29	7.13053e-28
CDK2	1.06993	3.60806	12.2882	5.16316e-29	7.35611e-28
TNFRSF21	1.66288	3.9596	12.2834	5.38113e-29	7.63724e-28
DDX11	1.00315	2.05308	12.275	5.78231e-29	8.18151e-28
SBF1	1.03107	3.74435	12.2563	6.79196e-29	9.52987e-28
RAD21	1.00716	5.72635	12.2558	6.81697e-29	9.55771e-28
WASF1	1.17794	2.8448	12.2532	6.97175e-29	9.76732e-28
CHST11	1.38733	2.04248	12.2467	7.37427e-29	1.03078e-27
LINC01485	-2.5854	5.04836	-12.2426	7.64015e-29	1.06473e-27
SEPTIN5	1.26773	1.85844	12.2414	7.71458e-29	1.07348e-27
UBE2C	1.89165	4.32093	12.2248	8.89861e-29	1.22454e-27
TP53I11	1.09025	3.33785	12.2238	8.97286e-29	1.23372e-27
CENPH	1.027	2.44056	12.2161	9.58205e-29	1.31066e-27
NCAPG2	1.07985	2.35019	12.2071	1.03521e-28	1.40766e-27
RAD51AP1	1.24583	2.1087	12.2031	1.07191e-28	1.45542e-27
HIF1A	1.38835	4.72644	12.2021	1.08058e-28	1.46612e-27
CCNB1	1.57738	4.09333	12.2017	1.08485e-28	1.47083e-27
NCEH1	1.42972	2.24611	12.1864	1.23588e-28	1.65857e-27
RAB11FIP5	1.10043	2.91366	12.1827	1.27608e-28	1.7051e-27
SPINT1	2.59354	2.69012	12.1665	1.46532e-28	1.94403e-27
SMC4	1.37245	2.44758	12.1665	1.4654e-28	1.94403e-27
NPAS2	1.02913	2.17712	12.1627	1.51472e-28	2.00227e-27
HEATR1	1.06409	2.86882	12.1543	1.62653e-28	2.14251e-27
S100A11	1.75389	7.26262	12.1477	1.72201e-28	2.26173e-27
CDCA5	1.393	2.89538	12.1472	1.72837e-28	2.26846e-27
RBM38	1.00966	4.10683	12.1448	1.76477e-28	2.31296e-27
KIF4A	1.48577	2.51445	12.1341	1.93329e-28	2.52132e-27
PPP1R18	1.24031	4.26586	12.1283	2.03246e-28	2.64134e-27
LINGO1	1.52498	1.6638	12.1272	2.05102e-28	2.66172e-27
PLCD3	1.15552	1.55751	12.1192	2.19753e-28	2.8399e-27
FNBP1L	1.10324	3.63864	12.1139	2.29854e-28	2.95598e-27
KPNA2	1.20591	5.39538	12.1033	2.51722e-28	3.22822e-27
SMOX	1.46	3.01969	12.1019	2.54664e-28	3.26142e-27
MTHFD1L	1.04719	2.64218	12.1012	2.56208e-28	3.27894e-27
NCAPG	1.37675	2.30878	12.0766	3.15925e-28	4.01539e-27
NECTIN1	1.11585	2.61002	12.0757	3.18485e-28	4.04515e-27
QSOX1	2.13388	3.70878	12.0727	3.26741e-28	4.14148e-27
TMCO3	1.22049	3.21687	12.0691	3.36785e-28	4.26294e-27
OSBP2	1.00615	1.2798	12.0596	3.65354e-28	4.59313e-27
CLIP2	1.48933	2.52804	12.0427	4.21924e-28	5.24723e-27
ARL4C	1.47225	3.4378	12.0417	4.25603e-28	5.28943e-27
TAT	-3.27433	6.79352	-12.0374	4.4148e-28	5.47571e-27
ZNF731P	1.36705	2.96141	12.031	4.66127e-28	5.75824e-27
UCK2	1.00514	3.56838	12.0306	4.67967e-28	5.77711e-27
PPARD	1.03598	4.24133	12.0237	4.96157e-28	6.10881e-27
LIMA1	1.06881	3.33058	12.0227	5.00237e-28	6.15494e-27
AL390728.5	1.19027	3.08592	12.0207	5.09065e-28	6.25524e-27
LAMA5	1.32414	3.35694	12.0073	5.70517e-28	6.95318e-27
RAD51	1.06844	1.75298	12.0033	5.90208e-28	7.17601e-27
GPD1L	1.15103	2.20223	12.0011	6.0141e-28	7.29676e-27
PKDCC	1.51793	3.32597	11.9906	6.57412e-28	7.94609e-27
NEO1	1.07258	3.16646	11.9854	6.87385e-28	8.27592e-27
ZNF496	1.16703	2.11472	11.9631	8.30985e-28	9.90807e-27
MELTF	1.47762	1.56108	11.953	9.05686e-28	1.07502e-26
PM20D2	1.14726	2.65076	11.9505	9.24932e-28	1.09646e-26
AP1G2	1.15387	2.23031	11.9327	1.07546e-27	1.26678e-26
RAD54L	1.16084	1.37258	11.9316	1.08574e-27	1.27808e-26
TGIF2	1.04616	3.78758	11.9265	1.13443e-27	1.332e-26
SLC18B1	1.02438	3.38706	11.9238	1.15992e-27	1.3576e-26
PLEKHA2	1.03578	2.29736	11.9237	1.16113e-27	1.3576e-26
HID1	1.46106	2.35278	11.9097	1.3081e-27	1.52239e-26
ORC1	1.18573	1.85313	11.8998	1.42206e-27	1.64776e-26
BCL9L	1.27893	2.41017	11.8995	1.42664e-27	1.65203e-26
MCAM	1.17528	4.06727	11.8966	1.46119e-27	1.69085e-26
ABHD17C	1.05189	2.74756	11.8799	1.68377e-27	1.93765e-26
STK39	1.55459	2.55399	11.8764	1.73394e-27	1.99167e-26
STK24	1.0873	2.72284	11.8725	1.7931e-27	2.05324e-26
ASPM	1.33892	2.23509	11.867	1.87887e-27	2.14747e-26
HROB	1.01159	1.74031	11.8613	1.97066e-27	2.24682e-26
DTL	1.36767	2.48146	11.8598	1.99688e-27	2.27251e-26
MAMLD1	1.28176	1.76002	11.8463	2.2389e-27	2.52772e-26
ARNT2	1.32967	1.01621	11.845	2.26406e-27	2.55145e-26
H2AZ1	1.06175	6.62163	11.8341	2.48167e-27	2.78818e-26
CPD	1.15367	5.01573	11.8328	2.5106e-27	2.81897e-26
LINC01702	-2.34876	3.78526	-11.8317	2.53321e-27	2.84264e-26
GPR160	1.13034	1.52738	11.8237	2.71115e-27	3.02672e-26
TMC6	1.39139	2.38124	11.814	2.94312e-27	3.26693e-26
LPAR2	1.36585	1.8177	11.8134	2.95747e-27	3.2809e-26
DAGLA	1.13843	1.42832	11.811	3.01844e-27	3.34452e-26
PSPH	1.22548	4.22568	11.8031	3.22676e-27	3.57106e-26
PLAUR	1.21614	1.90373	11.8002	3.30519e-27	3.65567e-26
ELOVL7	1.82706	1.80861	11.7822	3.8491e-27	4.21941e-26
SPC25	1.194	2.22373	11.7758	4.06383e-27	4.439e-26
H2AX	1.20232	5.20093	11.7695	4.28577e-27	4.65669e-26
SHCBP1	1.15609	1.49417	11.7673	4.36648e-27	4.73603e-26
MGAT5	1.05367	2.76511	11.7665	4.39566e-27	4.7593e-26
LRFN1	1.05067	1.20147	11.7574	4.74513e-27	5.1197e-26
SMC2	1.02022	2.513	11.7203	6.49392e-27	6.91376e-26
CLIC1	1.17151	7.65369	11.7126	6.92685e-27	7.35774e-26
TGFA	1.45106	1.39659	11.7027	7.5264e-27	7.97626e-26
GORAB	1.07724	2.85556	11.6983	7.81329e-27	8.26609e-26
SGO1	1.01876	1.45155	11.6945	8.06578e-27	8.51373e-26
TTYH3	1.36702	4.66	11.6927	8.19333e-27	8.6385e-26
CDCA3	1.13294	1.92426	11.6852	8.72224e-27	9.15959e-26
FLNA	1.59464	5.08423	11.6793	9.17306e-27	9.58945e-26
RAVER1	1.08679	2.02573	11.6774	9.31426e-27	9.72607e-26
ASF1B	1.4641	3.10264	11.6747	9.53393e-27	9.93301e-26
TMED3	1.45198	2.02034	11.6688	1.00177e-26	1.04194e-25
PLCB1	1.053	1.65208	11.662	1.06051e-26	1.10056e-25
RBBP8	1.0257	2.88056	11.6587	1.09043e-26	1.12876e-25
ZNF239	1.13693	1.1331	11.649	1.18367e-26	1.2188e-25
ANO9	1.26831	1.14229	11.6488	1.18562e-26	1.22013e-25
GPRIN1	1.07765	1.60828	11.6458	1.2153e-26	1.24789e-25
NEURL3	1.61503	2.06546	11.6432	1.24247e-26	1.27508e-25
CUEDC1	1.00904	3.13501	11.6406	1.27019e-26	1.30064e-25
ANXA5	1.32899	6.88673	11.6395	1.28161e-26	1.31161e-25
HPD	-3.34048	8.57165	-11.6258	1.43741e-26	1.46341e-25
AURKB	1.48838	2.93229	11.6207	1.50147e-26	1.52732e-25
CARD10	1.02515	4.05829	11.6121	1.61385e-26	1.63444e-25
HP	-2.52831	10.6076	-11.6102	1.63948e-26	1.65949e-25
ITGB4	1.49424	2.41511	11.6063	1.69455e-26	1.71066e-25
RAB3D	1.43355	1.78866	11.5986	1.8069e-26	1.81604e-25
PAQR4	1.33115	2.53369	11.5814	2.0869e-26	2.08273e-25
EVC	1.49257	1.60249	11.5755	2.19302e-26	2.1804e-25
CARMIL1	1.13439	1.83598	11.5713	2.27234e-26	2.24882e-25
LOXL2	1.03965	2.76503	11.5692	2.31184e-26	2.2838e-25
LDHD	-1.38435	5.9931	-11.5683	2.3291e-26	2.2984e-25
ACSS1	1.29817	2.25824	11.562	2.45559e-26	2.41677e-25
UBE2T	1.35579	4.17763	11.5607	2.48398e-26	2.44212e-25
ADD3	1.28352	3.16275	11.5589	2.5206e-26	2.47418e-25
C1orf116	1.49088	1.03059	11.5469	2.7889e-26	2.73029e-25
ANKS6	1.22091	1.90224	11.5466	2.7954e-26	2.73521e-25
FGD1	1.03292	2.30681	11.5426	2.88977e-26	2.82455e-25
TAX1BP3	1.24892	4.28498	11.5379	3.00611e-26	2.93516e-25
CHST1	1.18577	1.70682	11.5317	3.16648e-26	3.09012e-25
TMSB4X	1.19273	9.31393	11.5285	3.25105e-26	3.17098e-25
DLG3	1.22257	1.39625	11.5273	3.28545e-26	3.20284e-25
TUBA1B	1.44549	5.76811	11.5269	3.29593e-26	3.21136e-25
SEL1L3	1.78626	2.9023	11.526	3.32042e-26	3.23352e-25
SPTLC1	1.02271	3.51863	11.5183	3.54353e-26	3.42553e-25
TTC36	-2.55759	3.31652	-11.513	3.7042e-26	3.56966e-25
HUNK	1.20787	0.919815	11.5129	3.70633e-26	3.56986e-25
CDC45	1.27069	2.42189	11.5121	3.73039e-26	3.59116e-25
MID1IP1	1.19766	5.52601	11.5022	4.05177e-26	3.87432e-25
NDC80	1.25392	2.45603	11.4996	4.14062e-26	3.95315e-25
IFT57	1.16106	2.39709	11.496	4.26913e-26	4.07164e-25
OLFML2B	1.27169	2.62042	11.4868	4.60908e-26	4.37106e-25
GPX8	1.10391	1.68804	11.4752	5.07959e-26	4.7927e-25
ZNF385A	1.10975	3.23818	11.4732	5.16482e-26	4.86815e-25
RBP4	-1.69278	12.54	-11.4705	5.28213e-26	4.96858e-25
CDR2L	1.22926	1.98382	11.4698	5.31275e-26	4.99231e-25
CDC25A	1.07308	1.6364	11.4694	5.33146e-26	5.00735e-25
FZD7	1.21704	1.44063	11.4671	5.43434e-26	5.09621e-25
ZWINT	1.40589	3.94572	11.467	5.43729e-26	5.0964e-25
MICAL1	1.08829	2.42431	11.4647	5.54374e-26	5.18827e-25
SDC3	1.12306	3.92886	11.4581	5.85932e-26	5.46702e-25
CDCA7L	1.22978	2.0385	11.4511	6.21313e-26	5.77965e-25
TAF6	1.06333	3.58386	11.4397	6.8328e-26	6.31164e-25
SLC7A7	1.17875	2.23818	11.4379	6.93596e-26	6.39734e-25
ITGA3	1.48735	1.93806	11.4345	7.13751e-26	6.56856e-25
PAFAH1B3	1.56347	4.47465	11.4335	7.19229e-26	6.61397e-25
PREX1	1.06138	3.14279	11.4278	7.54229e-26	6.91863e-25
CMTM7	1.03264	2.64891	11.4185	8.1567e-26	7.45635e-25
IGF2BP2	1.85643	2.58167	11.4175	8.21959e-26	7.51013e-25
EGLN3	1.44189	1.54283	11.411	8.68073e-26	7.88859e-25
KLHL23	1.03577	2.82506	11.4105	8.71942e-26	7.91985e-25
TOR3A	1.03242	4.92743	11.4021	9.34967e-26	8.4715e-25
PRXL2B	1.10274	3.84185	11.3972	9.73483e-26	8.79464e-25
TMEM164	1.0662	2.65986	11.3879	1.05214e-25	9.44526e-25
OIP5	1.17264	2.22959	11.3859	1.07022e-25	9.59358e-25
CNTNAP1	1.00574	1.2425	11.3841	1.08631e-25	9.72838e-25
ZNF28	1.17513	1.67368	11.3809	1.11518e-25	9.97724e-25
ARHGEF3	1.16037	2.27705	11.3778	1.14492e-25	1.02384e-24
TPM3P9	1.04729	2.00553	11.376	1.16133e-25	1.03701e-24
SMC3	1.10027	4.33797	11.3733	1.18855e-25	1.05724e-24
TNIK	1.1397	1.39333	11.3729	1.1918e-25	1.05961e-24
ZNF468	1.29932	2.00051	11.3576	1.35423e-25	1.19769e-24
FAM241B	1.40768	2.81216	11.3565	1.36655e-25	1.20743e-24
SCRN1	1.42422	1.86937	11.3508	1.43283e-25	1.26298e-24
INAVA	1.56493	1.45825	11.3441	1.5152e-25	1.33177e-24
CDC20	1.78311	3.94845	11.3422	1.53847e-25	1.35158e-24
SYDE1	1.04888	2.34065	11.331	1.68858e-25	1.47227e-24
PAQR5	1.68579	1.88822	11.3281	1.72968e-25	1.50598e-24
PCLAF	1.23266	2.58555	11.3246	1.78077e-25	1.5461e-24
SKA1	1.32611	2.151	11.3231	1.80299e-25	1.56392e-24
CTBP2	1.04425	1.31813	11.3225	1.81219e-25	1.57116e-24
CHST10	1.02735	1.25027	11.3205	1.84246e-25	1.59292e-24
KIRREL1	1.17518	1.84674	11.3193	1.86145e-25	1.60709e-24
GUCY1A1	1.13896	1.64373	11.3163	1.90834e-25	1.6445e-24
ALOX5	1.45959	1.92489	11.3122	1.97391e-25	1.69863e-24
FBLN1	1.84662	3.21802	11.3009	2.16893e-25	1.85866e-24
RGS2	1.68915	3.71108	11.2994	2.19524e-25	1.87983e-24
RAP2A	1.05525	3.86462	11.2872	2.42955e-25	2.06953e-24
AL354872.1	-1.59977	3.7667	-11.2835	2.50551e-25	2.1313e-24
PFKFB3	1.71406	3.21487	11.2777	2.62941e-25	2.23361e-24
PMEPA1	1.68323	2.45373	11.2752	2.68508e-25	2.27776e-24
PRTFDC1	1.09729	1.82224	11.2663	2.88921e-25	2.44308e-24
C6orf132	1.25386	0.772645	11.2443	3.46754e-25	2.89766e-24
CKAP2	1.03517	2.74509	11.2369	3.68529e-25	3.07546e-24
TGFB1	1.52818	4.30826	11.2356	3.72649e-25	3.10843e-24
ZIC5	1.05421	0.84915	11.2346	3.75774e-25	3.13309e-24
SKA3	1.16149	1.9718	11.2332	3.80107e-25	3.16494e-24
LENG8	1.00692	4.56394	11.2214	4.19194e-25	3.46697e-24
PYGB	1.10168	5.28392	11.22	4.24021e-25	3.50376e-24
CTSK	1.38666	3.32216	11.2099	4.60776e-25	3.79054e-24
TLDC2	1.16561	1.63581	11.2079	4.68488e-25	3.85055e-24
ATP9A	1.16617	3.73592	11.1957	5.18571e-25	4.24333e-24
DCXR-DT	-1.70015	2.92887	-11.1934	5.28179e-25	4.31622e-24
ITM2C	1.49757	5.31938	11.1927	5.31523e-25	4.34163e-24
C12orf75	1.85868	2.83404	11.1874	5.55408e-25	4.52673e-24
CTSV	1.29509	1.02297	11.1797	5.91454e-25	4.80358e-24
VGLL4	1.05117	2.31585	11.1657	6.64343e-25	5.37197e-24
MCM5	1.09168	4.23975	11.1612	6.89327e-25	5.56426e-24
PBK	1.37105	2.6206	11.154	7.31559e-25	5.8923e-24
DCK	1.02014	3.15309	11.1515	7.46799e-25	6.00459e-24
GLIS3	1.1394	1.35263	11.1494	7.60005e-25	6.10016e-24
RAB31	1.14782	2.54866	11.1327	8.71988e-25	6.93279e-24
SLC45A4	1.25433	1.58169	11.1206	9.63426e-25	7.63679e-24
HEG1	1.07515	2.89451	11.1171	9.91394e-25	7.84504e-24
EPHB3	1.07064	0.917838	11.114	1.01734e-24	8.03657e-24
KRT80	1.45434	1.00961	11.1068	1.07908e-24	8.5098e-24
FSCN1	1.24959	4.14997	11.106	1.08624e-24	8.56263e-24
SEC14L2	-1.71796	5.22237	-11.1029	1.11503e-24	8.77083e-24
CD24	2.71857	5.39672	11.0966	1.17361e-24	9.21204e-24
SERPINE2	1.63993	2.31838	11.0949	1.19024e-24	9.32675e-24
LRIG3	1.14142	2.6133	11.0915	1.2239e-24	9.57831e-24
TRIM47	1.3235	4.37849	11.0877	1.26352e-24	9.87999e-24
RASSF8	1.03352	1.68352	11.0767	1.38345e-24	1.07768e-23
PITX1	1.71725	1.42986	11.0704	1.456e-24	1.12802e-23
SOX12	1.19772	3.67402	11.0666	1.5026e-24	1.16169e-23
BICC1	1.86293	2.29077	11.0616	1.56557e-24	1.20785e-23
HTRA3	1.61273	2.07709	11.059	1.59985e-24	1.23275e-23
ITGA2	1.22892	1.6307	11.0475	1.75777e-24	1.34602e-23
CAPG	1.69913	4.35595	11.0443	1.80451e-24	1.37953e-23
ITGAV	1.30972	4.1102	11.0434	1.81885e-24	1.38934e-23
SMAGP	1.00249	2.79627	11.0316	2.00318e-24	1.52385e-23
SLC10A1	-2.86409	5.81389	-11.0267	2.08593e-24	1.58224e-23
ATP1B3	1.24604	4.57376	11.0219	2.16916e-24	1.64134e-23
ZNF320	1.17953	1.48056	11.0161	2.27574e-24	1.71567e-23
ARID3A	1.51362	2.1879	11.0138	2.31821e-24	1.74484e-23
RIDA	-1.21074	8.29854	-11.0094	2.40371e-24	1.80405e-23
RAVER2	1.14356	1.62171	10.9991	2.61546e-24	1.95583e-23
PCK2	-1.36354	7.44152	-10.9986	2.62666e-24	1.96341e-23
SLC16A3	1.41574	2.25819	10.9953	2.69906e-24	2.01509e-23
KRT19	2.543	2.21223	10.9865	2.89987e-24	2.16245e-23
MELTF-AS1	1.04122	1.4231	10.9861	2.90954e-24	2.16873e-23
TIMP2	1.54785	4.8827	10.9846	2.94585e-24	2.19402e-23
MCM7	1.08326	5.44106	10.9819	3.01215e-24	2.23889e-23
ATP11A	1.04328	2.91616	10.9692	3.34259e-24	2.47456e-23
PRKDC	1.00255	3.9996	10.9502	3.90348e-24	2.87254e-23
MCUB	1.10825	1.69203	10.9492	3.93544e-24	2.89491e-23
SPHK1	1.97392	2.43561	10.9409	4.21367e-24	3.0922e-23
GAL3ST4	1.0066	1.31293	10.9342	4.44895e-24	3.26098e-23
FKBP10	1.66537	3.29182	10.9327	4.50654e-24	3.30057e-23
ENO2	1.30112	1.53301	10.923	4.87799e-24	3.56134e-23
IL27RA	1.03046	2.57308	10.9188	5.04555e-24	3.68221e-23
STK26	1.30044	2.28698	10.918	5.08135e-24	3.70542e-23
EZR	1.18424	5.71912	10.8941	6.17234e-24	4.46053e-23
RTP3	-2.28359	4.7237	-10.8901	6.38213e-24	4.60315e-23
GYS2	-2.1996	3.95889	-10.8896	6.40602e-24	4.61498e-23
CENPM	1.42864	2.99758	10.8615	8.0575e-24	5.76208e-23
BLMH	1.35899	3.3856	10.8585	8.25185e-24	5.89195e-23
ARFGEF3	1.12475	0.999307	10.8431	9.35601e-24	6.66233e-23
AZGP1	-1.76326	8.82593	-10.8426	9.39786e-24	6.68698e-23
CENPW	1.31427	3.9732	10.8381	9.74759e-24	6.92517e-23
FMNL1	1.02936	2.05891	10.8277	1.0607e-23	7.51843e-23
RASA3	1.13369	2.25881	10.8263	1.07285e-23	7.5929e-23
PLEKHB1	1.47442	1.07626	10.8201	1.12849e-23	7.95321e-23
SERPINC1	-2.41035	11.0879	-10.8148	1.17792e-23	8.29526e-23
IGSF3	1.46335	2.18929	10.8134	1.1919e-23	8.39051e-23
GUCY1B1	1.06906	2.30553	10.8103	1.2225e-23	8.59608e-23
DENND2B	1.00296	2.65545	10.8073	1.25245e-23	8.78328e-23
CERCAM	1.2613	1.73514	10.8063	1.26217e-23	8.84808e-23
NR1I3	-1.86562	4.7423	-10.7922	1.41537e-23	9.87715e-23
CA5A	-1.1169	2.27771	-10.7874	1.47167e-23	1.02507e-22
IQGAP3	1.2815	2.63683	10.7823	1.53393e-23	1.06723e-22
LBH	1.18717	3.57979	10.7803	1.55933e-23	1.08409e-22
MARVELD1	1.23584	2.44155	10.7798	1.56586e-23	1.08781e-22
RAP1GAP	1.57963	3.92678	10.776	1.61444e-23	1.11903e-22
PLAU	1.12102	2.78358	10.7718	1.67166e-23	1.15696e-22
LARP6	1.16081	1.28634	10.7664	1.74543e-23	1.20621e-22
MAP3K21	1.11017	1.64786	10.7439	2.09599e-23	1.4404e-22
TUBB6	1.13894	3.02249	10.6899	3.24599e-23	2.19401e-22
C19orf48	1.02907	5.15369	10.6844	3.39379e-23	2.28973e-22
LIMK2	1.08985	3.56624	10.6842	3.39977e-23	2.29292e-22
TCEAL9	1.60343	5.19299	10.6831	3.42803e-23	2.31114e-22
SOX9	1.91088	3.77551	10.6738	3.69684e-23	2.48331e-22
DEPDC1	1.07347	1.47749	10.664	4.001e-23	2.6779e-22
ADGRG1	1.30441	2.58482	10.6615	4.0835e-23	2.72819e-22
HMGB2	1.1327	5.17551	10.6594	4.15364e-23	2.77304e-22
GLYATL1	-1.77034	4.46568	-10.6472	4.58398e-23	3.04824e-22
LIF	1.46049	1.61902	10.642	4.77885e-23	3.17326e-22
PDE4A	1.01512	1.74186	10.6328	5.14758e-23	3.40709e-22
SMARCD3	1.17667	1.92555	10.6226	5.58811e-23	3.68155e-22
WWTR1	1.11333	3.29326	10.6195	5.73238e-23	3.77122e-22
KLF5	1.56892	2.12662	10.6189	5.75628e-23	3.78425e-22
SLC2A6	1.3381	2.64977	10.6159	5.90007e-23	3.87327e-22
ESPL1	1.08914	1.85573	10.6152	5.93368e-23	3.89257e-22
SLC38A1	1.5922	2.83686	10.6113	6.12088e-23	4.01111e-22
TRNP1	2.04714	3.59311	10.6097	6.19917e-23	4.05954e-22
NRP1	1.08079	4.04337	10.5973	6.85286e-23	4.45448e-22
CTHRC1	1.79344	2.53666	10.5921	7.14324e-23	4.63508e-22
E2F8	1.04683	1.44974	10.5843	7.61132e-23	4.92327e-22
NES	1.0779	3.93843	10.582	7.75051e-23	5.0098e-22
MACROH2A2	1.82011	3.60226	10.5812	7.80119e-23	5.03727e-22
PFKFB1	-1.6341	3.70287	-10.5767	8.08747e-23	5.21121e-22
PDP1	1.11903	1.74301	10.5569	9.48618e-23	6.0828e-22
CREB3L1	1.39542	1.52404	10.5528	9.80204e-23	6.27012e-22
ITPRIPL2	1.02774	2.57238	10.5523	9.84526e-23	6.29124e-22
TCF19	1.34185	3.46244	10.5496	1.00555e-22	6.42117e-22
TTC39A	1.28507	1.57085	10.549	1.01102e-22	6.45161e-22
AC113191.1	1.05027	1.35157	10.5443	1.04933e-22	6.68147e-22
G6PD	1.58214	4.17046	10.5143	1.33563e-22	8.42134e-22
CDKN3	1.3961	3.33782	10.5105	1.37699e-22	8.66736e-22
AC006329.1	-1.46549	2.35101	-10.5023	1.47093e-22	9.22101e-22
DNM1	1.12568	1.1735	10.4984	1.51674e-22	9.50172e-22
COL5A2	1.31222	3.74169	10.4796	1.76426e-22	1.09853e-21
PTGFRN	1.19485	3.8891	10.474	1.845e-22	1.14601e-21
COL6A3	1.39859	2.89207	10.4707	1.8938e-22	1.17445e-21
PAQR8	1.12335	1.67568	10.467	1.95103e-22	1.20791e-21
DUSP4	1.02805	1.1626	10.4555	2.13896e-22	1.31886e-21
PKMYT1	1.01772	1.84753	10.4474	2.28329e-22	1.40422e-21
ANKRD10-IT1	1.13317	2.35986	10.4448	2.33006e-22	1.43203e-21
ARL2	1.0268	4.385	10.4434	2.35643e-22	1.44776e-21
HMGN4	1.12115	5.05846	10.4421	2.38101e-22	1.46189e-21
CD248	1.10208	3.42257	10.4401	2.41978e-22	1.4852e-21
KLHL29	1.03174	1.47863	10.4374	2.4717e-22	1.51555e-21
CCL16	-2.25656	5.96315	-10.4356	2.5091e-22	1.53696e-21
C3P1	-2.04484	4.50473	-10.4266	2.69631e-22	1.64401e-21
TMEM159	1.04668	1.6069	10.4183	2.88107e-22	1.75032e-21
SLC12A2	1.24689	2.22619	10.4173	2.90237e-22	1.7621e-21
INTS3	1.00452	3.44518	10.4159	2.93574e-22	1.77944e-21
BLVRA	1.29116	4.53957	10.4148	2.96078e-22	1.79344e-21
TES	1.19048	3.55097	10.4148	2.96213e-22	1.79367e-21
UAP1L1	1.27496	1.76688	10.41	3.07844e-22	1.8615e-21
COL16A1	1.18912	1.52577	10.3931	3.5221e-22	2.112e-21
CLCF1	1.11216	2.36456	10.38	3.9097e-22	2.33308e-21
PSRC1	1.02671	2.27978	10.3507	4.93819e-22	2.92324e-21
DTX3	1.08612	2.04328	10.3451	5.16357e-22	3.05372e-21
GMNN	1.16794	5.09717	10.3442	5.19922e-22	3.07382e-21
APOC1	-1.35033	12.599	-10.3298	5.82953e-22	3.43658e-21
SLC44A3	1.43653	3.49836	10.3231	6.15e-22	3.61743e-21
FOXO6	1.02709	0.840133	10.3164	6.4874e-22	3.80862e-21
PIP4P2	1.13918	2.28198	10.3163	6.49253e-22	3.81042e-21
GLIPR2	1.0268	2.61076	10.3148	6.5676e-22	3.85203e-21
ACSM5	-1.98343	4.80299	-10.302	7.27185e-22	4.23954e-21
APOF	-2.25876	5.24009	-10.3005	7.35876e-22	4.28886e-21
AQP9	-2.54712	6.98093	-10.2947	7.70415e-22	4.48592e-21
PLP2	1.53369	5.67721	10.2892	8.04886e-22	4.67339e-21
TFDP1	1.05142	4.40916	10.2853	8.30181e-22	4.8112e-21
SLC44A2	1.07005	4.01353	10.2839	8.39751e-22	4.86209e-21
ATP8B2	1.07633	2.29239	10.2832	8.44348e-22	4.88412e-21
TC2N	1.41656	1.83297	10.2747	9.03468e-22	5.21143e-21
ANXA4	1.20387	5.23958	10.2712	9.28395e-22	5.34355e-21
TFRC	1.05786	4.58257	10.2613	1.00435e-21	5.76101e-21
HNF1B	1.37343	2.87678	10.2545	1.06003e-21	6.04849e-21
CDC42EP1	1.07464	6.91911	10.2518	1.08341e-21	6.17425e-21
CDO1	-1.80146	6.99194	-10.25	1.09836e-21	6.25371e-21
GPC4	1.45712	1.59332	10.2491	1.10623e-21	6.29653e-21
WDR76	1.0758	2.1394	10.2395	1.1939e-21	6.7747e-21
CA9	2.3019	1.66981	10.2393	1.19591e-21	6.78402e-21
SPINT1-AS1	1.31705	1.14227	10.2326	1.2613e-21	7.13528e-21
PTHLH	1.1876	0.850699	10.2268	1.31972e-21	7.45206e-21
MIR3685	1.20726	2.73314	10.2228	1.36249e-21	7.68657e-21
MOGAT2	-1.94454	2.9746	-10.2227	1.36323e-21	7.68839e-21
RAB3IL1	1.1856	2.72801	10.2224	1.3669e-21	7.70671e-21
MFGE8	1.05512	3.15119	10.2177	1.41836e-21	7.98715e-21
SLC12A8	1.10651	2.66222	10.215	1.44874e-21	8.14581e-21
AC239800.2	-1.28923	1.54611	-10.2065	1.54985e-21	8.69054e-21
CYP4A22	-1.80281	4.86703	-10.2062	1.5535e-21	8.70839e-21
TGFB2	1.10873	1.19826	10.1993	1.64067e-21	9.17182e-21
BIRC5	1.49235	3.57396	10.1947	1.70095e-21	9.49463e-21
AL355102.4	1.55468	1.89071	10.1942	1.7079e-21	9.52768e-21
ADM2	1.38684	3.05025	10.1913	1.74703e-21	9.72837e-21
ETNPPL	-2.00964	4.71141	-10.1909	1.7529e-21	9.75515e-21
IGF2BP3	1.0562	0.759611	10.1833	1.86103e-21	1.03351e-20
ALDOA	1.11217	7.06467	10.1833	1.862e-21	1.03374e-20
AC040970.1	1.01287	0.974057	10.1806	1.90194e-21	1.05528e-20
ST6GALNAC4	1.03721	2.82412	10.1669	2.11864e-21	1.16781e-20
AC104083.1	1.09838	2.08943	10.1655	2.14313e-21	1.18061e-20
C8A	-1.71128	7.1218	-10.1652	2.14754e-21	1.18268e-20
RRM2	1.32555	3.62711	10.1629	2.18625e-21	1.20293e-20
ASNS	1.39966	2.16541	10.158	2.27356e-21	1.24911e-20
ITGB1	1.31272	6.09907	10.1555	2.31784e-21	1.27192e-20
CXCR4	1.30266	4.56747	10.1541	2.34458e-21	1.28507e-20
EHF	1.51144	1.78518	10.1514	2.39441e-21	1.312e-20
CDH6	1.10289	1.15407	10.1512	2.39835e-21	1.31376e-20
CCNA2	1.37609	3.12984	10.1494	2.43329e-21	1.33172e-20
JCAD	1.04294	2.54918	10.146	2.49837e-21	1.36653e-20
TYMS	1.29736	4.08867	10.1325	2.77853e-21	1.51528e-20
PDGFRB	1.18361	4.32562	10.126	2.92523e-21	1.592e-20
SNAP25	1.46401	1.48249	10.1176	3.12561e-21	1.69507e-20
GPT	-1.4507	5.99739	-10.1089	3.345e-21	1.81005e-20
OLFML3	1.41946	2.78141	10.097	3.67456e-21	1.98e-20
PXDN	1.03742	2.44628	10.096	3.70194e-21	1.99417e-20
VCAN	1.52346	1.895	10.0681	4.61133e-21	2.45685e-20
DLG5	1.08861	2.10291	10.0678	4.6194e-21	2.46044e-20
PAG1	1.04571	2.24851	10.0616	4.85112e-21	2.58164e-20
CYP4F2	-1.95896	5.39787	-10.0437	5.58153e-21	2.95503e-20
FGFR1	1.11263	1.57792	10.0432	5.60335e-21	2.96573e-20
MASP2	-1.91187	6.03365	-10.0392	5.78184e-21	3.05758e-20
PLBD1	1.47235	2.36887	10.0381	5.83221e-21	3.08157e-20
PTP4A3	1.46428	4.04273	10.0269	6.36739e-21	3.35094e-20
GRB7	1.1899	3.14152	10.0251	6.45855e-21	3.39505e-20
STMN1	1.16699	4.71753	10.0208	6.67933e-21	3.50782e-20
LTBP1	1.2871	2.71124	10.0096	7.2928e-21	3.80654e-20
CDT1	1.29391	2.99867	9.99937	7.89876e-21	4.10891e-20
MYOF	1.13857	2.06285	9.98708	8.69529e-21	4.51184e-20
KCNJ11	1.07674	1.51488	9.98235	9.02235e-21	4.66975e-20
MDFI	1.28416	1.49219	9.97897	9.26352e-21	4.78922e-20
ANXA2P2	1.04971	2.48104	9.96757	1.0126e-20	5.21038e-20
COL4A2	1.22509	5.77811	9.96461	1.03629e-20	5.32482e-20
PFKP	1.50221	2.52477	9.96158	1.06113e-20	5.4434e-20
COL1A2	1.79497	4.91833	9.95295	1.13503e-20	5.81123e-20
SYK	1.03124	1.9735	9.95153	1.14762e-20	5.86756e-20
MACIR	1.10665	1.49565	9.94847	1.17537e-20	6.00447e-20
RDH16	-2.17007	5.63779	-9.93929	1.2626e-20	6.4323e-20
CDCP1	1.12392	0.917645	9.92964	1.36122e-20	6.91379e-20
ARNTL2	1.08356	1.97063	9.92794	1.37936e-20	7.00396e-20
F12	-1.78135	8.16542	-9.92789	1.37987e-20	7.00466e-20
ADH1B	-2.33571	7.88249	-9.92448	1.41699e-20	7.18522e-20
SLC25A24	1.06033	1.44864	9.89527	1.77865e-20	8.96013e-20
SGPP2	1.26445	0.938431	9.89398	1.79657e-20	9.04583e-20
HAO1	-1.73167	7.31297	-9.89035	1.84799e-20	9.2993e-20
TUBA1A	1.05863	4.03779	9.88196	1.9725e-20	9.90968e-20
AC016735.1	1.58212	1.45194	9.8748	2.08536e-20	1.04653e-19
HES4	1.12512	2.80315	9.86719	2.21232e-20	1.10724e-19
HEYL	1.33049	2.81309	9.86617	2.22987e-20	1.11572e-19
NCS1	1.11469	2.10603	9.86029	2.33404e-20	1.16563e-19
COL5A1	1.57142	2.99202	9.856	2.41313e-20	1.20253e-19
CKS2	1.07056	5.92072	9.84836	2.56037e-20	1.27419e-19
AP001972.5	1.03324	2.1903	9.83661	2.80475e-20	1.39057e-19
LIMD2	1.16715	2.77865	9.81983	3.1941e-20	1.576e-19
PLPP2	1.92509	1.99897	9.80823	3.49409e-20	1.71623e-19
PGAP4	1.26805	1.80911	9.78936	4.04339e-20	1.97346e-19
YBX3	1.18753	2.86085	9.78291	4.2499e-20	2.06825e-19
CBX6	1.18202	2.66664	9.77991	4.34956e-20	2.11452e-19
BTG2	1.21899	4.59708	9.76716	4.79999e-20	2.32738e-19
LAPTM4B	1.49075	6.03388	9.7613	5.02182e-20	2.43048e-19
TPPP3	1.0971	2.35916	9.75866	5.12555e-20	2.48003e-19
LDOC1	1.53769	2.45363	9.75832	5.13887e-20	2.48582e-19
FGFR3	1.34734	4.86763	9.75423	5.30364e-20	2.56218e-19
MISP	1.82305	1.2811	9.74723	5.59801e-20	2.69945e-19
ENC1	1.13773	3.22198	9.74362	5.75594e-20	2.77127e-19
GRAMD1B	1.14341	1.26507	9.74129	5.86005e-20	2.81993e-19
AC137723.1	-1.08818	1.46656	-9.7339	6.20391e-20	2.98152e-19
QPCT	1.12461	1.57116	9.71917	6.94921e-20	3.32415e-19
ASRGL1	1.11842	1.9234	9.71279	7.29945e-20	3.48538e-19
CIB2	1.06065	1.6989	9.70475	7.76493e-20	3.69904e-19
TM6SF2	-1.28129	3.58755	-9.69989	8.06089e-20	3.83411e-19
PLOD2	1.08526	4.6024	9.69661	8.26661e-20	3.92792e-19
TMSB10	1.39865	10.6798	9.69327	8.48213e-20	4.02449e-19
FMNL2	1.17674	2.15646	9.68566	8.993e-20	4.25013e-19
GNAZ	1.45127	2.56169	9.68093	9.3256e-20	4.3972e-19
HAAO	-1.10811	6.53037	-9.67779	9.55364e-20	4.50128e-19
CDC25B	1.04788	4.77535	9.67663	9.63946e-20	4.53941e-19
NUAK2	1.15718	2.93348	9.6726	9.94239e-20	4.67017e-19
ISYNA1	1.48568	3.46085	9.6713	1.00422e-19	4.71467e-19
POSTN	1.70759	2.26973	9.66327	1.0681e-19	5.00441e-19
CES2	-1.4526	7.46911	-9.64148	1.26244e-19	5.87328e-19
LINC00844	-2.58764	3.59078	-9.6407	1.26997e-19	5.90681e-19
CYP26B1	1.05469	0.839839	9.64044	1.27248e-19	5.91703e-19
NOTCH3	1.17402	3.40452	9.6334	1.34304e-19	6.2357e-19
ANG	-1.40739	8.82791	-9.63212	1.35631e-19	6.2926e-19
ARMCX1	1.0085	1.96616	9.63161	1.36158e-19	6.31546e-19
IL4I1	1.23788	1.78855	9.63014	1.37701e-19	6.3818e-19
RMI2	1.12573	2.56803	9.63012	1.37727e-19	6.3818e-19
VIL1	1.98895	3.49659	9.62839	1.39555e-19	6.45845e-19
COL1A1	1.98361	5.64727	9.62552	1.42658e-19	6.59708e-19
EPCAM	2.77352	2.70281	9.61142	1.58926e-19	7.32374e-19
S100A6	1.66165	6.76916	9.60975	1.60976e-19	7.41269e-19
LRRN2	1.00868	1.11334	9.60861	1.62387e-19	7.47208e-19
FMOD	1.57485	2.69409	9.6013	1.71725e-19	7.89193e-19
MRC2	1.24163	2.2019	9.60097	1.7216e-19	7.90997e-19
B3GNT5	1.17977	1.68463	9.59941	1.74228e-19	7.99898e-19
CYBA	1.55689	4.63763	9.59315	1.82767e-19	8.37646e-19
PTGES	1.72613	1.78541	9.59187	1.84558e-19	8.45646e-19
TEDC2	1.01083	2.17325	9.58852	1.89352e-19	8.66324e-19
CDC42BPG	1.05325	1.30755	9.58686	1.91766e-19	8.76286e-19
PWWP2B	1.07321	3.62309	9.58489	1.94669e-19	8.88931e-19
F3	1.0446	1.4976	9.57731	2.06278e-19	9.40506e-19
COL4A1	1.19503	5.72201	9.57492	2.10078e-19	9.57125e-19
CSF1	1.04854	3.69986	9.57248	2.14038e-19	9.74448e-19
LINC02041	1.28921	1.10186	9.56773	2.21945e-19	1.00796e-18
FOXJ1	1.34016	0.919601	9.56577	2.25284e-19	1.02237e-18
MAT1A	-1.47589	8.61008	-9.53542	2.83966e-19	1.27523e-18
ARMCX6	1.04255	1.7744	9.51612	3.28913e-19	1.46851e-18
MST1R	1.00306	0.845883	9.50736	3.51582e-19	1.5667e-18
STMN3	1.25732	2.19727	9.49076	3.98885e-19	1.77192e-18
EPHB6	1.244	1.46394	9.49032	4.00209e-19	1.77697e-18
TGFB3	1.03815	2.34328	9.48611	4.13218e-19	1.83077e-18
SLC6A8	1.67725	2.76139	9.47528	4.48654e-19	1.97971e-18
TMSB4XP8	1.24125	3.50954	9.46284	4.93091e-19	2.16648e-18
HK2	1.35993	1.55482	9.46179	4.97035e-19	2.18329e-18
FAM222A	1.02543	3.22233	9.45484	5.23917e-19	2.29647e-18
LGALS9	1.06977	3.45325	9.45385	5.27858e-19	2.31101e-18
EIF5A2	1.08504	1.67128	9.45042	5.41799e-19	2.37091e-18
IER3	1.5328	5.22562	9.44539	5.62843e-19	2.45835e-18
ETV4	1.84321	2.91935	9.43958	5.88192e-19	2.5606e-18
LINC00665	1.23954	1.58472	9.43803	5.95126e-19	2.58957e-18
B3GNT3	1.92025	2.89661	9.40598	7.58522e-19	3.27054e-18
AMIGO2	1.04673	1.74839	9.3919	8.43639e-19	3.61395e-18
MNDA	1.00078	1.83836	9.3885	8.65629e-19	3.70472e-18
ZNF83	1.21831	1.98934	9.38231	9.07065e-19	3.87846e-18
F9	-2.21886	6.26045	-9.37848	9.33666e-19	3.98759e-18
TNFAIP8L3	1.06193	1.89648	9.3775	9.40543e-19	4.01604e-18
ALDH1L1	-1.9984	5.54062	-9.3476	1.17851e-18	4.98952e-18
ANXA2	1.04221	6.29839	9.33914	1.25601e-18	5.3067e-18
COL3A1	1.87084	5.73157	9.32915	1.35409e-18	5.69894e-18
SUSD4	1.75673	2.38203	9.31514	1.50458e-18	6.31507e-18
SLC22A1	-2.68054	5.69892	-9.2935	1.77028e-18	7.39668e-18
TCEAL8	1.44752	5.3721	9.28107	1.94344e-18	8.08367e-18
EMP3	1.08371	3.86356	9.27906	1.9729e-18	8.19884e-18
NDRG1	1.2973	5.37759	9.27707	2.00263e-18	8.31864e-18
SPARC	1.07549	7.4739	9.2729	2.06626e-18	8.58101e-18
PTTG1	1.34556	3.96984	9.27217	2.07753e-18	8.62203e-18
HMMR	1.08749	2.47361	9.27102	2.09562e-18	8.69513e-18
F2R	1.15202	3.43673	9.26879	2.13088e-18	8.83551e-18
PIPOX	-1.33473	7.13216	-9.26761	2.14982e-18	8.91205e-18
CYP4A11	-1.8449	6.71098	-9.26189	2.24402e-18	9.29004e-18
SPATC1L	1.25313	2.35815	9.25253	2.40696e-18	9.94014e-18
SPAG5	1.0458	3.60272	9.23031	2.8426e-18	1.16818e-17
ADGRA2	1.08977	2.11059	9.22857	2.87992e-18	1.18273e-17
SPDYC	-1.08605	2.10437	-9.22759	2.90098e-18	1.19085e-17
ABCB4	-1.55477	4.66777	-9.22564	2.94363e-18	1.20755e-17
HAGLR	1.37993	1.25714	9.22033	3.06293e-18	1.25316e-17
GPX7	1.33405	2.95039	9.21804	3.11562e-18	1.27387e-17
SMARCC2	1.00832	3.41341	9.21211	3.25685e-18	1.32868e-17
TACC1	1.05353	3.50089	9.20128	3.53132e-18	1.43622e-17
SULT2A1	-2.16998	8.30462	-9.19915	3.58783e-18	1.4576e-17
LAMP5	1.13226	0.733791	9.18325	4.03987e-18	1.63549e-17
SLC29A4	1.6819	2.31979	9.18223	4.07052e-18	1.64682e-17
ADGRE5	1.15168	3.73685	9.18014	4.1346e-18	1.67055e-17
DCDC2	1.84478	2.84892	9.17865	4.18067e-18	1.6888e-17
SLFN13	1.1299	1.07698	9.1779	4.20424e-18	1.69795e-17
C6	-1.73043	6.20386	-9.17331	4.35044e-18	1.75354e-17
VEGFB	1.4834	5.59184	9.16841	4.51216e-18	1.81636e-17
RGS10	1.07037	3.52144	9.15754	4.89269e-18	1.96441e-17
DAB2	1.17254	3.55057	9.14488	5.37632e-18	2.15344e-17
LAMC2	1.23916	0.925455	9.13701	5.70011e-18	2.27819e-17
MAGED1	1.08419	5.87588	9.13232	5.90225e-18	2.35492e-17
ADORA2BP1	-1.36809	1.81367	-9.12432	6.26379e-18	2.49432e-17
EPS8L1	1.06886	0.862031	9.12091	6.42483e-18	2.55735e-17
RGS1	1.48384	2.90254	9.11951	6.49164e-18	2.58227e-17
KIF12	1.43892	3.87056	9.11204	6.86193e-18	2.72196e-17
THY1	1.01489	4.19239	9.10923	7.00657e-18	2.77517e-17
LOX	1.10687	1.89512	9.10858	7.04054e-18	2.78743e-17
IGSF23	-1.61587	4.00264	-9.10512	7.22363e-18	2.8575e-17
CXCL5	1.63098	1.01425	9.10404	7.28185e-18	2.87803e-17
DPYS	-1.72537	6.50755	-9.08912	8.13411e-18	3.19983e-17
CYP2J2	-1.15711	5.52757	-9.08463	8.40911e-18	3.30309e-17
UGT2B10	-2.02811	6.82834	-9.08402	8.44701e-18	3.31657e-17
APLP1	1.22144	1.16589	9.07498	9.0324e-18	3.53665e-17
PRSS23	1.0034	2.49881	9.06057	1.00487e-17	3.92296e-17
EPS8L3	1.77129	2.81341	9.0602	1.00766e-17	3.93303e-17
ATAD2	1.04699	3.90635	9.04945	1.09104e-17	4.24412e-17
RAB34	1.48117	3.16289	9.03733	1.19323e-17	4.62027e-17
SPINT2	1.79001	2.59609	9.03173	1.24367e-17	4.80753e-17
PPM1H	1.12632	1.91118	9.02088	1.34735e-17	5.19744e-17
PCK1	-2.29706	6.49843	-9.02011	1.35503e-17	5.22598e-17
RGN	-1.19653	6.54172	-9.01663	1.39033e-17	5.35764e-17
TEAD4	1.03144	2.44052	9.00808	1.4808e-17	5.69204e-17
MMP10	1.02268	0.636945	8.9958	1.62106e-17	6.20282e-17
AZGP1P1	-1.23659	3.44987	-8.995	1.63066e-17	6.23826e-17
TESC	1.93274	3.56614	8.99059	1.68454e-17	6.43907e-17
SYT13	1.33655	0.830286	8.98773	1.72035e-17	6.56508e-17
ANTXR1	1.15798	2.15478	8.98242	1.78896e-17	6.81987e-17
FOXS1	1.0455	2.09577	8.95062	2.26011e-17	8.54555e-17
NCF2	1.1707	2.89366	8.94013	2.4411e-17	9.20914e-17
RECQL4	1.0513	3.41484	8.93059	2.61814e-17	9.84692e-17
PMP22	1.05015	3.10264	8.92199	2.7886e-17	1.04689e-16
PDE9A	1.21623	1.99539	8.91321	2.97382e-17	1.11393e-16
MEST	1.03957	4.01962	8.91244	2.99073e-17	1.11991e-16
APOBEC3C	1.07213	2.72521	8.9071	3.11007e-17	1.16285e-16
LAMA5-AS1	-1.60786	2.94023	-8.88758	3.58772e-17	1.33282e-16
BEX4	1.17596	3.45309	8.88372	3.69039e-17	1.37013e-16
MST1	-1.09863	6.45927	-8.87394	3.96399e-17	1.46671e-16
MXRA8	1.19332	2.84989	8.86708	4.16771e-17	1.5387e-16
PYCR1	1.82302	3.14771	8.86122	4.34979e-17	1.60304e-16
LINC02381	1.26629	1.67342	8.85702	4.48509e-17	1.64995e-16
AURKA	1.05383	3.82081	8.85557	4.53289e-17	1.66687e-16
CENPU	1.01696	2.97562	8.85534	4.54048e-17	1.66899e-16
CCNE1	1.25494	2.08968	8.84277	4.97668e-17	1.82317e-16
FNDC1	1.05037	1.0649	8.83333	5.33109e-17	1.94688e-16
CYP2A6	-3.2038	6.74229	-8.83259	5.35985e-17	1.9558e-16
ITIH5	1.35737	1.04137	8.82311	5.74335e-17	2.08873e-16
HNF4A-AS1	-1.46021	3.27301	-8.82019	5.86648e-17	2.13099e-16
APOC3	-1.89643	12.589	-8.81238	6.20971e-17	2.25213e-16
BHMT	-2.22956	6.36398	-8.80846	6.38918e-17	2.31314e-16
PRR15L	1.78694	2.43143	8.79637	6.9766e-17	2.51743e-16
IGFBP3	1.22469	5.96757	8.79251	7.17517e-17	2.58656e-16
B4GALNT4	1.23609	0.776601	8.79019	7.2972e-17	2.62952e-16
CCND2P1	-1.71762	3.45555	-8.77298	8.26803e-17	2.96204e-16
CFHR4	-1.75737	4.01551	-8.76674	8.65108e-17	3.09567e-16
CLGN	1.57127	2.71793	8.7659	8.70394e-17	3.11338e-16
PRNP	1.15622	4.90666	8.75363	9.5136e-17	3.39315e-16
PROM1	1.1241	0.630043	8.7519	9.63385e-17	3.43273e-16
DPYSL3	1.046	2.2912	8.73274	1.10679e-16	3.92481e-16
SULF1	1.27467	1.84157	8.72861	1.14033e-16	4.03676e-16
E2F1	1.30917	3.95632	8.71758	1.23504e-16	4.35955e-16
B3GNT7	1.02392	1.17563	8.71558	1.25305e-16	4.42143e-16
H2AW	1.53757	1.73182	8.71374	1.26978e-16	4.47873e-16
TTR	-1.88405	10.2575	-8.70481	1.35436e-16	4.76706e-16
RASEF	1.15881	1.72396	8.69571	1.44639e-16	5.06976e-16
AKR1C6P	-1.44164	2.92522	-8.68373	1.5769e-16	5.50635e-16
SEMA6A	1.16926	1.70509	8.67356	1.69691e-16	5.90866e-16
BAAT	-1.33179	8.35698	-8.67346	1.69811e-16	5.91173e-16
OTC	-1.93188	6.32383	-8.64925	2.0215e-16	6.99674e-16
ADH4	-2.6886	7.36592	-8.64829	2.03555e-16	7.04274e-16
MMP2	1.46185	3.409	8.64301	2.11437e-16	7.30042e-16
MMP9	1.66206	3.16457	8.6408	2.14819e-16	7.41165e-16
CYP27A1	-1.11787	8.45557	-8.63755	2.19898e-16	7.58265e-16
DMTN	1.03227	3.68439	8.62607	2.38808e-16	8.20716e-16
MMP7	1.94522	2.12755	8.61802	2.53001e-16	8.68366e-16
HPX	-1.61761	9.8893	-8.6055	2.76789e-16	9.45972e-16
BHLHE41	1.01982	1.25285	8.60237	2.83079e-16	9.66578e-16
RHOV	1.14748	0.767747	8.59705	2.94084e-16	1.0023e-15
TNC	1.15651	2.1032	8.59681	2.9458e-16	1.00362e-15
ADHFE1	-1.01717	4.05588	-8.58964	3.10119e-16	1.05482e-15
OSMR	1.18589	2.92594	8.57783	3.37478e-16	1.14325e-15
MMP1	1.01624	1.14233	8.57077	3.5497e-16	1.20008e-15
NPNT	1.34953	2.10711	8.56768	3.62896e-16	1.22531e-15
METRNL	1.14856	3.17816	8.56312	3.74933e-16	1.26388e-15
CXCL8	1.81865	2.82103	8.55641	3.93344e-16	1.32257e-15
DMKN	1.35886	1.22107	8.54997	4.11859e-16	1.38281e-15
AC092535.5	1.17855	3.49672	8.54824	4.16991e-16	1.39826e-15
RAB11FIP1	1.05302	1.93363	8.54762	4.18845e-16	1.40422e-15
SGCE	1.53925	3.61453	8.54479	4.27384e-16	1.43181e-15
ENTPD2	1.02511	2.00268	8.49983	5.88847e-16	1.95013e-15
AC115619.1	-1.1595	5.64687	-8.48609	6.49305e-16	2.1423e-15
ZIC2	1.22709	1.89184	8.4771	6.92149e-16	2.27838e-15
LAPTM5	1.03077	5.6328	8.46786	7.39075e-16	2.42637e-15
BCAM	1.11878	6.09136	8.45782	7.93632e-16	2.6027e-15
CTSC	1.0783	3.81329	8.45301	8.21223e-16	2.69132e-15
DMGDH	-1.275	4.80893	-8.45173	8.28701e-16	2.71434e-15
DAO	-1.39813	4.45742	-8.44283	8.82634e-16	2.88669e-15
IER5L	1.00902	2.89421	8.43939	9.04449e-16	2.95564e-15
AL161668.4	-1.14226	2.22749	-8.43714	9.18991e-16	3.0021e-15
SIPA1L2	1.11994	3.06571	8.43453	9.36108e-16	3.05478e-15
RTL8A	1.06739	5.26612	8.43094	9.60183e-16	3.13113e-15
A1BG	-1.47039	5.20267	-8.40478	1.1554e-15	3.7512e-15
SLC27A2	-1.31824	6.43493	-8.38634	1.31603e-15	4.25625e-15
NID1	1.01133	5.81934	8.38337	1.34393e-15	4.34423e-15
HKDC1	1.55956	3.91319	8.37509	1.42474e-15	4.59421e-15
ETNK2	-1.39307	5.64747	-8.37204	1.45575e-15	4.69091e-15
LYPD1	1.41415	1.97059	8.36874	1.48995e-15	4.79777e-15
IL2RG	1.27317	3.50383	8.36868	1.49055e-15	4.79886e-15
DUSP9	1.73346	3.05779	8.34939	1.70742e-15	5.46758e-15
ENPP5	1.0574	0.988033	8.34844	1.71891e-15	5.50246e-15
CXCL1	1.90724	2.40532	8.34259	1.79107e-15	5.72554e-15
COL6A2	1.23794	5.49594	8.34159	1.8038e-15	5.76325e-15
KCNQ1	1.00097	1.99288	8.33583	1.87831e-15	5.98991e-15
HSD11B1	-2.55261	6.90468	-8.33102	1.94294e-15	6.18643e-15
ARHGAP4	1.01568	3.46868	8.32257	2.0617e-15	6.54315e-15
SULF2	1.29487	3.75182	8.31658	2.15027e-15	6.8149e-15
AC021146.9	-1.59755	3.78235	-8.31316	2.20252e-15	6.96618e-15
GCNT3	1.13474	1.2707	8.30552	2.32368e-15	7.3381e-15
TNFAIP2	1.03634	4.50346	8.29907	2.43125e-15	7.66863e-15
FXYD3	1.37403	1.25795	8.29362	2.52597e-15	7.94975e-15
MMP12	1.25733	1.00923	8.29272	2.54184e-15	7.99699e-15
LARGE2	1.27893	2.07511	8.28498	2.68356e-15	8.42995e-15
HSD17B6	-1.75135	7.99493	-8.28434	2.69549e-15	8.46598e-15
LTBP2	1.16328	2.67756	8.27905	2.79716e-15	8.77191e-15
AR	-1.25309	3.4747	-8.27171	2.94461e-15	9.22178e-15
MAL2	1.31337	5.27631	8.27023	2.97535e-15	9.31334e-15
TNFAIP3	1.00162	4.01124	8.26045	3.18592e-15	9.94553e-15
SCAMP5	1.09453	2.87762	8.25284	3.35987e-15	1.04744e-14
CYP2C9	-1.97134	7.06438	-8.2433	3.59123e-15	1.11693e-14
HGD	-1.18863	7.75243	-8.24309	3.59645e-15	1.11818e-14
CFHR2	-1.18524	4.05111	-8.23619	3.77372e-15	1.17034e-14
SCD5	1.06455	1.19459	8.22317	4.13239e-15	1.27708e-14
MIR647	1.10276	2.93205	8.20452	4.70542e-15	1.44884e-14
GPRC5B	1.05887	2.47643	8.18915	5.23641e-15	1.60539e-14
ALOX5AP	1.06242	2.18771	8.18459	5.40476e-15	1.65453e-14
BACE2	1.39487	2.20888	8.1795	5.59957e-15	1.7119e-14
BDH1	-1.06009	5.13637	-8.16394	6.23782e-15	1.90294e-14
PRAP1	-1.67696	8.95748	-8.16289	6.28336e-15	1.9162e-14
GALNT18	1.02918	3.44344	8.16169	6.33616e-15	1.93103e-14
PALM	1.03588	2.66126	8.15027	6.85775e-15	2.08449e-14
ANXA13	1.64401	3.05959	8.14615	7.05632e-15	2.14274e-14
AC079360.1	-1.1234	1.39674	-8.14467	7.12924e-15	2.16381e-14
SLC34A2	1.43025	0.918427	8.13758	7.48801e-15	2.26675e-14
CYP2A7	-2.33709	2.9487	-8.13198	7.78363e-15	2.35316e-14
ABCC4	1.03321	1.97219	8.12686	8.06433e-15	2.43603e-14
TREM2	1.21523	3.13801	8.10746	9.22122e-15	2.77417e-14
TMEM119	1.09224	1.56109	8.10177	9.59095e-15	2.88258e-14
CTH	-1.51963	5.01918	-8.10068	9.66293e-15	2.9028e-14
RAC2	1.08977	3.64429	8.10037	9.68395e-15	2.90817e-14
AP001783.1	-1.93819	2.67441	-8.1	9.70827e-15	2.915e-14
GEM	1.19585	2.49622	8.0979	9.85017e-15	2.95617e-14
HJV	-1.68521	7.04748	-8.09497	1.00511e-14	3.01255e-14
BICDL1	1.00588	2.42913	8.08377	1.08579e-14	3.24544e-14
RBP5	-1.27935	6.83379	-8.07997	1.11463e-14	3.32732e-14
SFRP5	1.72249	1.28416	8.07984	1.11562e-14	3.32976e-14
PI3	1.68711	2.0288	8.06694	1.2193e-14	3.62632e-14
SELENOW	1.02916	4.70441	8.05657	1.30939e-14	3.88427e-14
SPC24	1.005	3.17809	8.05636	1.31132e-14	3.88938e-14
GPR35	1.08873	1.25643	8.05046	1.36561e-14	4.04585e-14
SCTR	1.20657	1.10293	8.03589	1.50932e-14	4.45661e-14
RENBP	1.23132	3.19871	8.02166	1.66412e-14	4.89728e-14
CYB561	1.11414	3.693	8.01132	1.78639e-14	5.24128e-14
APP	1.06342	7.03476	8.00996	1.80311e-14	5.28782e-14
LINC02362	-1.11233	2.2262	-8.00206	1.90326e-14	5.56826e-14
GSTA7P	-1.28845	2.81934	-8.00091	1.91833e-14	5.61058e-14
FGFR2	1.75392	3.36111	7.99764	1.96173e-14	5.73115e-14
PLG	-1.53893	8.22684	-7.99738	1.96525e-14	5.73964e-14
LTB	1.32229	3.4429	7.99674	1.97388e-14	5.76303e-14
IGF2BP1	1.30359	1.53187	7.99418	2.00876e-14	5.86299e-14
HSPG2	1.20303	3.25081	7.99274	2.02862e-14	5.92002e-14
AKR7A3	-1.69562	5.60055	-7.97813	2.2418e-14	6.51441e-14
MUC1	1.08934	1.07487	7.9755	2.28232e-14	6.62901e-14
FETUB	-1.91313	5.51636	-7.95947	2.54637e-14	7.36701e-14
C19orf33	1.32003	1.56783	7.95686	2.59204e-14	7.49096e-14
LINC01018	-1.95221	3.44037	-7.95552	2.61584e-14	7.55736e-14
SLC2A1	1.06288	2.10786	7.9533	2.65569e-14	7.66411e-14
ELF3	1.10349	4.64322	7.94987	2.7186e-14	7.83834e-14
AP001065.3	-1.01075	2.52684	-7.94126	2.88282e-14	8.29242e-14
SCTR-AS1	1.00783	1.13472	7.9327	3.05597e-14	8.77821e-14
GPR137B	1.03371	3.68456	7.93077	3.09628e-14	8.88709e-14
AGXT2	-1.29231	3.97404	-7.91988	3.33438e-14	9.55713e-14
PROZ	-1.28855	4.2806	-7.91551	3.43497e-14	9.83328e-14
TM4SF1	1.1444	5.77066	7.9137	3.47734e-14	9.9484e-14
EVA1A	-1.01446	5.15484	-7.90781	3.61943e-14	1.03357e-13
DKK1	1.82718	1.72065	7.90777	3.62036e-14	1.03368e-13
AGXT	-1.62502	8.64045	-7.9062	3.6593e-14	1.04415e-13
SELENOM	1.41276	4.10595	7.89366	3.98445e-14	1.13483e-13
ITPKA	1.1865	2.94419	7.89261	4.01285e-14	1.14274e-13
TMPRSS3	1.27055	1.4717	7.88418	4.24907e-14	1.20722e-13
ITIH1	-1.33954	9.26451	-7.87557	4.50424e-14	1.27717e-13
GPR183	1.00416	2.34611	7.86716	4.76813e-14	1.3493e-13
FOLR1	1.05065	0.943409	7.84976	5.36394e-14	1.5112e-13
PRAME	1.56261	1.17774	7.84714	5.45945e-14	1.53717e-13
SOD3	1.37895	3.25155	7.84647	5.48433e-14	1.54394e-13
PON3	-1.04545	5.88948	-7.84502	5.53856e-14	1.55898e-13
ESRP1	1.31711	0.819521	7.83009	6.12575e-14	1.71981e-13
CFHR3	-1.78099	4.77953	-7.81863	6.61802e-14	1.85322e-13
SLC1A2	-1.51998	2.67396	-7.8181	6.642e-14	1.85938e-13
GSTP1	1.12002	4.7671	7.81092	6.97107e-14	1.94914e-13
APOA5	-1.66272	7.23636	-7.807	7.15777e-14	1.99953e-13
CYP4F3	-1.07546	5.91651	-7.80349	7.32878e-14	2.04606e-13
ENPP7	-1.29862	3.27321	-7.80157	7.42437e-14	2.07119e-13
ARMCX3	1.30336	3.21555	7.80118	7.44388e-14	2.07631e-13
CPB2	-1.10476	9.05943	-7.79905	7.55097e-14	2.10365e-13
BAIAP2L2	1.34623	3.17782	7.79156	7.94173e-14	2.20785e-13
CYP4F11	-1.20577	5.53895	-7.78364	8.37576e-14	2.32572e-13
CPS1	-2.22375	7.02772	-7.78277	8.42494e-14	2.33797e-13
PON1	-1.68454	7.16676	-7.77619	8.80601e-14	2.44189e-13
AMBP	-1.12259	12.3849	-7.77573	8.83304e-14	2.44902e-13
WDR72	1.21846	2.2341	7.77351	8.9659e-14	2.48474e-13
TMC4	1.50255	2.17216	7.77161	9.08064e-14	2.5154e-13
ACADL	-1.14065	2.17709	-7.74874	1.05862e-13	2.91629e-13
BAMBI	1.3917	4.68107	7.74711	1.07027e-13	2.94663e-13
CCN2	1.15379	5.77172	7.73905	1.12966e-13	3.10551e-13
POF1B	1.10912	1.05663	7.71958	1.28676e-13	3.52117e-13
ACOX2	-1.01553	5.65611	-7.70386	1.42924e-13	3.89607e-13
ADH6	-1.18298	6.32539	-7.69941	1.47232e-13	4.01054e-13
AC008549.1	-1.65199	3.4518	-7.69001	1.56765e-13	4.26268e-13
TMC5	1.21367	1.21755	7.6597	1.91815e-13	5.18072e-13
PTPRS	1.14346	1.50712	7.65958	1.91968e-13	5.18409e-13
AP003119.3	-1.14909	2.31243	-7.65627	1.96242e-13	5.29565e-13
OSGIN1	-1.20362	6.71761	-7.63834	2.21062e-13	5.94546e-13
CYP2B6	-1.63826	4.9402	-7.62694	2.38422e-13	6.39666e-13
FBP1	-1.32203	7.73645	-7.62619	2.39608e-13	6.42742e-13
GPNMB	1.07931	3.87762	7.60374	2.78019e-13	7.42333e-13
BGN	1.38531	7.06407	7.60187	2.81491e-13	7.50846e-13
SLC13A5	-1.61114	5.23219	-7.59876	2.87331e-13	7.6609e-13
TMEM98	1.17376	4.12329	7.59333	2.97836e-13	7.92615e-13
AMDHD1	-1.11782	5.35547	-7.5775	3.30676e-13	8.76605e-13
UPB1	-1.36795	5.43079	-7.57474	3.36751e-13	8.91943e-13
LOXL1	1.01086	1.75608	7.57094	3.4529e-13	9.14167e-13
ABCB11	-1.46758	3.12621	-7.55347	3.87432e-13	1.02266e-12
CLDN4	1.84068	2.75698	7.55222	3.90645e-13	1.03041e-12
CCL20	1.869	4.7218	7.54758	4.02754e-13	1.06084e-12
PDGFA	1.02254	3.60381	7.54678	4.0489e-13	1.06601e-12
ISLR	1.46239	2.55582	7.54426	4.11665e-13	1.08292e-12
VTCN1	1.19343	0.788805	7.54363	4.13375e-13	1.08726e-12
EMID1	1.04439	2.26867	7.52883	4.55626e-13	1.19279e-12
TRPV4	1.10497	1.82806	7.52244	4.75164e-13	1.24218e-12
ARL14	1.08239	0.959559	7.5183	4.88242e-13	1.27529e-12
SYNGR1	1.08241	2.08083	7.51169	5.09903e-13	1.33018e-12
CYBB	1.04123	2.87313	7.5086	5.20344e-13	1.35646e-12
ALDOB	-1.85219	10.7214	-7.50488	5.33178e-13	1.38857e-12
KDELR3	1.13752	4.49348	7.50214	5.42869e-13	1.41299e-12
NR1I2	-1.27157	3.29906	-7.48977	5.88674e-13	1.5292e-12
INSIG1	-1.22025	7.81019	-7.48619	6.02653e-13	1.56463e-12
UNC5CL	1.09876	3.98639	7.47167	6.62714e-13	1.71407e-12
C6orf223	1.18947	0.948421	7.47147	6.63558e-13	1.71601e-12
TSKU	-1.27412	6.45401	-7.46894	6.74627e-13	1.74341e-12
CYP3A4	-2.93824	5.96432	-7.46588	6.88268e-13	1.77668e-12
LGALS3	1.24896	5.22186	7.46187	7.06511e-13	1.82174e-12
PHLDA2	1.26891	3.52782	7.45998	7.15307e-13	1.84288e-12
NXPH4	1.2962	1.69078	7.45572	7.35462e-13	1.89243e-12
CPN2	-1.28423	7.05258	-7.45231	7.52035e-13	1.93319e-12
THBS1	1.23574	4.14214	7.45111	7.57957e-13	1.94814e-12
ABCA6	-1.01827	3.31615	-7.44677	7.79698e-13	2.00152e-12
SLC51A	-1.40936	4.43988	-7.44169	8.05972e-13	2.06496e-12
CDS1	1.07496	1.44202	7.43917	8.19332e-13	2.09744e-12
ACOT12	-1.31145	4.46637	-7.43177	8.59764e-13	2.1976e-12
LOXL4	1.54079	3.33933	7.42526	8.97014e-13	2.28775e-12
ZNF703	1.08806	3.11716	7.42461	9.00828e-13	2.29653e-12
SLC28A1	-1.51056	3.81154	-7.40748	1.00699e-12	2.55626e-12
NAT2	-1.41081	2.6522	-7.40692	1.01066e-12	2.56463e-12
PFN2	1.19292	2.67217	7.40553	1.0198e-12	2.58698e-12
EPHX1	-1.05136	10.924	-7.39674	1.07975e-12	2.73242e-12
SAA4	-1.63472	7.27208	-7.38312	1.17952e-12	2.9734e-12
SRD5A2	-1.36723	2.41214	-7.38078	1.19753e-12	3.01592e-12
PDX1	1.25791	1.25196	7.37427	1.24913e-12	3.14203e-12
EHHADH	-1.08613	6.26723	-7.36531	1.32373e-12	3.3229e-12
ABAT	-1.10117	5.63102	-7.3588	1.38066e-12	3.45782e-12
LGALS3BP	1.39172	7.46608	7.34998	1.46178e-12	3.65158e-12
KRT17	1.09215	1.30396	7.34334	1.52584e-12	3.80597e-12
AC087482.1	-1.04261	4.90961	-7.32256	1.74479e-12	4.3328e-12
CDKN1C	1.07716	2.21966	7.32008	1.77291e-12	4.39969e-12
LINC01436	1.15525	1.08912	7.31983	1.77578e-12	4.40622e-12
AGR2	1.59621	1.20986	7.31367	1.84767e-12	4.57723e-12
IGSF1	1.00089	1.29333	7.31338	1.85115e-12	4.58462e-12
EPB41L1	1.22995	2.96921	7.3106	1.8846e-12	4.66308e-12
C8B	-1.18524	7.63154	-7.30989	1.89314e-12	4.68296e-12
C15orf48	1.3864	2.54467	7.29348	2.10404e-12	5.18801e-12
FTCD	-1.42997	7.16321	-7.27688	2.3408e-12	5.75261e-12
PRODH2	-1.25421	5.59153	-7.26819	2.47496e-12	6.07022e-12
GOLM1	1.18934	5.17618	7.25096	2.76401e-12	6.75408e-12
UCHL1	1.42955	1.557	7.21857	3.39978e-12	8.26503e-12
SEC24C	1.00207	3.60271	7.21661	3.44253e-12	8.36568e-12
CAPN6	1.09568	0.757651	7.21587	3.45885e-12	8.40421e-12
PLTP	1.16604	4.29393	7.18355	4.24965e-12	1.02677e-11
ZNF331	1.00894	2.33315	7.16073	4.91293e-12	1.18177e-11
PLGLA	-1.08668	1.88338	-7.15144	5.21123e-12	1.25044e-11
ASPN	1.13933	3.39089	7.14792	5.32873e-12	1.27765e-11
MYRIP	-1.20701	2.9092	-7.14651	5.37668e-12	1.28813e-11
AKR1C4	-1.40439	7.29115	-7.14469	5.43893e-12	1.3022e-11
BEX2	1.63484	2.58979	7.10679	6.91238e-12	1.64412e-11
S100A14	1.70409	4.07189	7.1012	7.16036e-12	1.70092e-11
LAD1	1.53057	4.89069	7.09381	7.50189e-12	1.77794e-11
ACMSD	-1.07082	5.27451	-7.09219	7.57924e-12	1.79581e-11
LECT2	-1.78598	5.1697	-7.0832	8.02098e-12	1.89683e-11
S100A4	1.03104	5.06966	7.08237	8.06282e-12	1.90623e-11
AFM	-1.51204	6.44648	-7.08162	8.1012e-12	1.91457e-11
SMIM32	1.38588	1.3327	7.07617	8.38398e-12	1.97913e-11
CES1	-1.47302	9.97063	-7.06964	8.73571e-12	2.05822e-11
TFR2	-1.08121	8.04848	-7.05566	9.53795e-12	2.24095e-11
BSPRY	1.02035	1.62206	7.04913	9.93665e-12	2.33285e-11
LINC01554	-2.08196	3.20732	-7.04686	1.00794e-11	2.36546e-11
NPTX2	1.46152	1.4732	7.03252	1.10282e-11	2.58223e-11
GSTA1	-1.88016	9.32477	-7.01698	1.21548e-11	2.83704e-11
APOA2	-1.65158	14.0468	-7.00464	1.313e-11	3.05425e-11
BEX3	1.36124	6.70181	7.00328	1.32414e-11	3.07862e-11
KNG1	-1.31246	10.0662	-7.00074	1.34536e-11	3.12639e-11
MTTP	-1.2289	5.66449	-6.99551	1.38999e-11	3.22686e-11
ST14	1.29407	4.20738	6.97915	1.53936e-11	3.56198e-11
PODXL2	1.48173	2.03986	6.97714	1.55872e-11	3.60588e-11
EMILIN1	1.15858	3.62101	6.97665	1.56354e-11	3.61612e-11
GADD45G	-1.02659	6.30241	-6.96963	1.63337e-11	3.7715e-11
MGP	1.26827	4.49851	6.96658	1.66469e-11	3.84238e-11
ICAM1	1.07967	4.80151	6.9557	1.78125e-11	4.10374e-11
THRSP	-2.23361	4.13175	-6.94963	1.84973e-11	4.25303e-11
AKR1B1	1.00373	3.51149	6.93995	1.96432e-11	4.50528e-11
THBS2	1.33954	3.12503	6.93462	2.03041e-11	4.65399e-11
HLA-DQB2	1.07776	2.48183	6.93249	2.05747e-11	4.71544e-11
GPD1	-1.25258	4.6803	-6.91862	2.24216e-11	5.12283e-11
LINC01093	-1.32523	2.07215	-6.91698	2.26506e-11	5.17325e-11
NDN	1.04427	2.66822	6.91413	2.3053e-11	5.2619e-11
USH1C	1.38972	1.5582	6.89985	2.51822e-11	5.72952e-11
UCA1	1.00271	0.649068	6.89631	2.5739e-11	5.85188e-11
SULT1C2	1.15105	1.95794	6.89497	2.59528e-11	5.89758e-11
MDK	1.36727	6.64578	6.89318	2.62424e-11	5.96192e-11
SPP2	-1.83721	5.94471	-6.89203	2.64294e-11	6.00293e-11
AC021074.3	-1.43197	3.5576	-6.87396	2.95466e-11	6.69123e-11
LGALS2	1.07808	2.57513	6.87126	3.00418e-11	6.79919e-11
MSC	1.4723	2.61837	6.85124	3.39841e-11	7.65957e-11
LRCOL1	-1.19298	1.98336	-6.84989	3.42673e-11	7.72151e-11
F13B	-1.20634	6.31256	-6.8375	3.6978e-11	8.31308e-11
ACP5	1.1138	4.6237	6.80688	4.46133e-11	9.96657e-11
ROBO1	1.13183	3.4619	6.8041	4.53803e-11	1.01343e-10
GCGR	-1.66533	3.20402	-6.75946	5.9594e-11	1.32168e-10
TPRG1-AS1	-1.17887	3.16836	-6.74772	6.40107e-11	1.41665e-10
PYCARD	1.03667	3.98269	6.74363	6.56197e-11	1.45121e-10
GBA3	-1.35317	3.63865	-6.73752	6.81026e-11	1.50325e-10
FSTL3	1.18727	3.8389	6.7347	6.92824e-11	1.52856e-10
SLC46A3	-1.17694	4.07515	-6.7241	7.38864e-11	1.62723e-10
APOC1P1	-1.50556	5.78742	-6.71921	7.61086e-11	1.67497e-10
FDCSP	1.57148	1.29673	6.71183	7.9592e-11	1.74913e-10
FMO3	-1.41638	7.08395	-6.68979	9.09512e-11	1.99002e-10
UGT2B7	-1.47712	7.1532	-6.67785	9.77524e-11	2.13378e-10
FMO1	1.04261	1.29018	6.67601	9.88437e-11	2.15734e-10
GNMT	-1.63433	5.97382	-6.65199	1.14243e-10	2.47911e-10
CA12	1.20234	1.88447	6.63545	1.26191e-10	2.73102e-10
ANXA10	-1.24719	3.49056	-6.63261	1.28359e-10	2.7763e-10
CYP2C8	-1.69724	6.78418	-6.60167	1.54529e-10	3.32445e-10
APCDD1	1.07278	1.22896	6.6012	1.54966e-10	3.33309e-10
ENPP2	1.0549	3.94452	6.59863	1.57365e-10	3.38192e-10
FLNC	1.18214	1.50642	6.59712	1.58795e-10	3.41027e-10
FABP4	-1.23897	3.12394	-6.59513	1.607e-10	3.4492e-10
UPP2	-1.23093	1.6727	-6.58655	1.69157e-10	3.62356e-10
ADH1A	-1.46951	7.84209	-6.56833	1.88593e-10	4.02219e-10
AFP	2.35441	3.9794	6.56056	1.97533e-10	4.2085e-10
APOA1	-1.65915	12.5585	-6.55535	2.03766e-10	4.33779e-10
TACSTD2	1.02946	1.46825	6.54317	2.19074e-10	4.65297e-10
CXCL6	1.37941	1.71259	6.54289	2.19439e-10	4.66017e-10
FXYD2	1.40079	1.54709	6.54237	2.20121e-10	4.67305e-10
GPT2	-1.02878	5.61367	-6.53594	2.28707e-10	4.8492e-10
F2RL1	1.20351	3.08107	6.5342	2.31076e-10	4.89832e-10
IGFBP2	-1.38471	6.92701	-6.53171	2.34525e-10	4.96972e-10
SERPINA11	-1.43499	6.8919	-6.53043	2.36309e-10	5.00637e-10
AC007423.1	-1.33134	1.62505	-6.52722	2.40859e-10	5.09927e-10
H19	2.16371	5.37137	6.51646	2.56731e-10	5.42287e-10
DUOX2	1.13522	0.950483	6.51057	2.65863e-10	5.61064e-10
MFSD2A	-1.52734	3.04343	-6.50916	2.68081e-10	5.65617e-10
HRG	-1.85444	8.73944	-6.5024	2.79037e-10	5.87725e-10
SLC6A12	-1.05587	3.876	-6.49578	2.90183e-10	6.10299e-10
ACSL4	1.54483	5.63061	6.48817	3.03545e-10	6.37314e-10
IGFBP5	1.07707	4.27308	6.46908	3.39744e-10	7.10251e-10
NAGS	-1.07797	4.32165	-6.45943	3.59629e-10	7.50211e-10
ITIH3	-1.11396	8.95922	-6.45329	3.7287e-10	7.77219e-10
NECAB2	-1.22016	3.03074	-6.44838	3.83801e-10	7.99373e-10
SAA1	-2.317	8.41895	-6.44392	3.94016e-10	8.20095e-10
UBXN10	-1.00697	2.03472	-6.43667	4.11176e-10	8.54945e-10
BHMT2	-1.02956	7.24897	-6.43498	4.15281e-10	8.63189e-10
MEP1A	1.27558	1.31504	6.41491	4.67175e-10	9.67248e-10
PEG10	2.07682	3.20888	6.41245	4.73943e-10	9.80933e-10
ARG1	-1.47865	7.80954	-6.36384	6.29606e-10	1.29226e-09
TMEM156	1.01921	1.65789	6.34565	6.9994e-10	1.43075e-09
APOM	-1.14341	8.19967	-6.32972	7.67802e-10	1.56635e-09
FOXQ1	1.22199	2.19455	6.31969	8.13756e-10	1.6579e-09
ZG16	-1.01779	2.5458	-6.31824	8.2064e-10	1.67115e-09
APOH	-1.24232	12.3476	-6.31701	8.26495e-10	1.68219e-09
LCAT	-1.00206	4.79384	-6.3007	9.08333e-10	1.84267e-09
ANGPTL3	-1.12108	7.38469	-6.30029	9.10467e-10	1.8468e-09
BIRC3	1.05569	3.72362	6.29947	9.14817e-10	1.85501e-09
OGDHL	-1.15726	4.54531	-6.29599	9.33391e-10	1.8906e-09
HSPB8	1.25216	2.9746	6.27641	1.04512e-09	2.11113e-09
VCAM1	1.09971	3.27426	6.2746	1.05607e-09	2.13231e-09
AC012065.2	-1.0578	3.77672	-6.24992	1.21728e-09	2.44766e-09
SDS	-2.08824	6.21328	-6.24347	1.26322e-09	2.53866e-09
SLC2A2	-1.22759	7.44735	-6.23719	1.3096e-09	2.62958e-09
RAB25	1.16768	0.842794	6.21802	1.46176e-09	2.92463e-09
UBD	1.29798	6.68865	6.21728	1.46797e-09	2.93673e-09
ADH1C	-1.84273	7.69558	-6.20921	1.53729e-09	3.07176e-09
RPL39L	1.17161	3.15981	6.20857	1.54293e-09	3.08236e-09
TIMP1	1.28822	7.94249	6.18	1.81632e-09	3.60826e-09
FGA	-1.11587	12.0758	-6.16955	1.92772e-09	3.82135e-09
PKIB	1.00087	1.92835	6.16942	1.92911e-09	3.82368e-09
PAH	-1.04883	7.4262	-6.15645	2.07689e-09	4.10297e-09
CYP2A13	-1.02907	1.23306	-6.14112	2.26567e-09	4.46066e-09
S100A9	1.25746	4.856	6.14049	2.27388e-09	4.47588e-09
C4BPA	-1.28302	9.31838	-6.12048	2.5467e-09	5.00117e-09
ALDH8A1	-1.01755	5.52183	-6.06972	3.39098e-09	6.60238e-09
FAM83A-AS1	-1.41211	1.82073	-6.05075	3.77219e-09	7.32148e-09
TAFA5	1.08546	1.42605	6.03502	4.11968e-09	7.97333e-09
TFF2	1.07485	0.836497	6.0107	4.71975e-09	9.1071e-09
PCSK1N	1.17831	1.28044	6.00314	4.92283e-09	9.48508e-09
GGT1	1.18398	4.11276	6.00022	5.00366e-09	9.63381e-09
ORM2	-1.045	10.5415	-6.00018	5.00479e-09	9.63397e-09
LINC01151	-1.01065	2.13434	-5.98758	5.36847e-09	1.03072e-08
DUOXA2	1.01624	0.965847	5.97837	5.65062e-09	1.08265e-08
SERPINE1	1.17185	5.83702	5.96291	6.15721e-09	1.17654e-08
FAM171A1	1.18924	3.88991	5.96184	6.19392e-09	1.18306e-08
AHSG	-1.54314	10.6938	-5.96089	6.22646e-09	1.18891e-08
TMEM82	-1.19235	3.64196	-5.95041	6.59882e-09	1.2578e-08
UGT1A4	-1.64179	4.11889	-5.91132	8.18951e-09	1.54887e-08
LUM	1.49617	3.61318	5.91017	8.24148e-09	1.55806e-08
OR2I1P	1.34366	6.34132	5.90852	8.3169e-09	1.57168e-08
SLC25A47	-1.81311	5.0445	-5.90793	8.34393e-09	1.5763e-08
MT1X	-1.44738	6.00072	-5.90691	8.39081e-09	1.58484e-08
F2	-1.00535	9.97831	-5.89228	9.09428e-09	1.71316e-08
CACNA1H	1.16083	2.18849	5.88295	9.57265e-09	1.80125e-08
SPP1	2.1396	6.69921	5.86057	1.08218e-08	2.02681e-08
SLC38A3	-1.00457	7.99587	-5.85547	1.1128e-08	2.08058e-08
UPK3A	1.5099	2.03361	5.85183	1.13518e-08	2.12114e-08
MIR4664	1.08292	3.2475	5.83963	1.21342e-08	2.26299e-08
FNDC5	-1.38999	2.97403	-5.82304	1.32837e-08	2.46913e-08
MSI1	1.07904	1.84936	5.82225	1.33409e-08	2.47886e-08
IGFBP1	-1.30696	8.82823	-5.80704	1.44918e-08	2.68615e-08
TFF3	1.09656	2.82929	5.76977	1.77372e-08	3.26773e-08
GBP7	-1.18791	3.79989	-5.76676	1.8028e-08	3.31866e-08
SERPINA4	-1.10852	7.32854	-5.74649	2.01136e-08	3.6868e-08
CYP1A2	-1.76484	2.70325	-5.74097	2.07209e-08	3.79511e-08
S100P	1.83298	3.49989	5.71173	2.42486e-08	4.42021e-08
APCS	-1.30714	10.1528	-5.69281	2.68367e-08	4.87852e-08
AEBP1	1.17642	4.23868	5.67362	2.97355e-08	5.38799e-08
SLC38A4	-1.03876	6.67382	-5.6658	3.10034e-08	5.60564e-08
AADAC	-1.08083	7.97364	-5.65751	3.24032e-08	5.84903e-08
TFF1	1.08449	0.947529	5.65702	3.24876e-08	5.86312e-08
FGG	-1.04847	11.317	-5.62986	3.7536e-08	6.73626e-08
CYP2D6	-1.18329	6.93854	-5.6277	3.7968e-08	6.80898e-08
GPLD1	-1.04584	3.21957	-5.56478	5.29367e-08	9.40401e-08
HAO2	-1.49459	4.26478	-5.52472	6.53137e-08	1.1534e-07
VNN2	1.0993	2.91963	5.52368	6.56703e-08	1.15959e-07
LINC01595	-1.13487	2.25146	-5.51567	6.84759e-08	1.20771e-07
UGT2A3	1.0085	3.6385	5.50147	7.37432e-08	1.29731e-07
PTGDS	1.64759	3.73248	5.4498	9.6443e-08	1.6832e-07
ORM1	-1.02817	11.9697	-5.44394	9.94069e-08	1.73395e-07
SERPIND1	-1.01785	9.30295	-5.40857	1.193e-07	2.06904e-07
HLA-DQA2	1.07635	3.30434	5.40306	1.22728e-07	2.12669e-07
CYP1A1	-1.4706	2.49724	-5.3892	1.31782e-07	2.27889e-07
CYP7A1	-1.49783	4.46955	-5.35156	1.59755e-07	2.74414e-07
SNCG	1.06894	3.83606	5.32975	1.78528e-07	3.05583e-07
TRIM55	-1.27362	3.84656	-5.32619	1.81782e-07	3.10922e-07
NTS	1.38086	1.41376	5.29175	2.16461e-07	3.68465e-07
SAA2-SAA4	-1.58675	4.01956	-5.25777	2.56919e-07	4.35012e-07
IGHV1-24	1.09869	1.60425	5.1973	3.47767e-07	5.83229e-07
GREM2	-1.07978	2.19258	-5.15701	4.24854e-07	7.08524e-07
IGHV4-39	1.36177	2.63638	5.15202	4.35489e-07	7.25803e-07
IGHG4	1.47658	3.52866	5.14474	4.51468e-07	7.51146e-07
RNU1-70P	-1.05466	7.71823	-5.09706	5.71005e-07	9.44423e-07
FGB	-1.03494	11.8417	-5.08153	6.16147e-07	1.01663e-06
LYZ	1.32859	7.03875	5.06322	6.73864e-07	1.10929e-06
TRIM50	1.02386	1.36628	5.04119	7.50254e-07	1.23175e-06
ERICH5	1.2495	4.80166	5.03549	7.71337e-07	1.26502e-06
CYP2B7P	-1.34699	3.42973	-5.0138	8.56939e-07	1.40106e-06
IGHV4-34	1.05296	2.07986	4.99665	9.31069e-07	1.51729e-06
IGKV4-1	1.47653	3.44514	4.98747	9.73237e-07	1.58294e-06
UGT2B15	-1.27469	7.23812	-4.98209	9.98818e-07	1.62355e-06
IGHV1-46	1.02067	1.67746	4.96925	1.06252e-06	1.72346e-06
BPIFB2	1.17768	1.62484	4.95468	1.13959e-06	1.84523e-06
KRT23	1.41108	2.93109	4.94778	1.17794e-06	1.90583e-06
SAA2	-1.6719	5.24442	-4.91719	1.36342e-06	2.1965e-06
SEZ6L2	1.23223	3.04921	4.91584	1.37224e-06	2.21014e-06
MUC13	1.53545	4.00894	4.9122	1.39627e-06	2.24592e-06
G6PC	-1.10302	7.62222	-4.8743	1.67176e-06	2.67577e-06
IGHV5-51	1.24647	2.60685	4.86099	1.78044e-06	2.84431e-06
AKR1D1	-1.16561	4.39097	-4.82326	2.12674e-06	3.37857e-06
CFHR5	-1.29707	5.72551	-4.77468	2.66939e-06	4.21383e-06
SFN	1.25479	4.40067	4.77051	2.72168e-06	4.29234e-06
GPC3	1.53043	7.55829	4.73591	3.19581e-06	5.01827e-06
MT1A	-1.12809	4.44899	-4.73171	3.25852e-06	5.11153e-06
FABP1	-1.27669	8.96446	-4.73056	3.27597e-06	5.13803e-06
CFHR1	-1.18653	8.0239	-4.72872	3.30386e-06	5.1809e-06
PAGE4	-1.24338	1.5173	-4.70877	3.62254e-06	5.66909e-06
CYP17A1	-1.32429	3.24122	-4.70327	3.7155e-06	5.80965e-06
DIO1	-1.00189	5.96991	-4.68895	3.9682e-06	6.19169e-06
IGLV1-51	1.19417	3.12426	4.67704	4.19116e-06	6.52581e-06
IGLV3-25	1.19826	2.55349	4.61723	5.50465e-06	8.48383e-06
IGHV3-23	1.27906	3.06754	4.55009	7.45006e-06	1.13872e-05
IGKV3-11	1.29851	3.22258	4.53381	8.01309e-06	1.22225e-05
IGLV3-21	1.21723	2.60477	4.50701	9.02992e-06	1.37203e-05
IGHV1-18	1.21055	2.51939	4.47801	1.02697e-05	1.55504e-05
IGHG2	1.38681	4.55698	4.47619	1.03528e-05	1.56711e-05
IGLV2-14	1.21549	3.09656	4.47493	1.04103e-05	1.57492e-05
IGHV3-11	1.02304	1.84215	4.46785	1.07411e-05	1.6243e-05
UROC1	-1.14687	3.40734	-4.45835	1.12012e-05	1.69165e-05
HSD17B13	-1.53308	4.50452	-4.45285	1.1476e-05	1.73217e-05
IGKV3-20	1.38938	3.96675	4.43775	1.22638e-05	1.84686e-05
IGHV3-15	1.07485	2.16802	4.42024	1.32424e-05	1.99051e-05
IGHV1-69D	1.05048	1.84757	4.42013	1.32484e-05	1.99125e-05
C9	-1.56229	5.40904	-4.41634	1.34704e-05	2.02395e-05
IGHV3-21	1.03977	2.10344	4.37441	1.61706e-05	2.41827e-05
IGHV3-30	1.10362	2.19273	4.37041	1.64539e-05	2.45746e-05
GSTA2	-1.41739	6.0842	-4.36084	1.71508e-05	2.55781e-05
IGHV4-59	1.1287	2.4148	4.29123	2.31382e-05	3.41932e-05
IGLV3-1	1.066	2.11905	4.26212	2.61945e-05	3.86018e-05
IGHG3	1.21897	3.80337	4.21587	3.18571e-05	4.67219e-05
IGLV2-11	1.04092	2.46967	4.19527	3.47395e-05	5.07936e-05
SPINK1	1.66837	6.29762	4.17921	3.71562e-05	5.42028e-05
ACSM1	-1.01983	3.76253	-4.16834	3.88835e-05	5.66154e-05
IGKV1-5	1.18736	3.16173	4.09837	5.19681e-05	7.50231e-05
IGHG1	1.47725	5.38873	4.0714	5.80531e-05	8.35272e-05
IGKC	1.36782	5.53241	4.04499	6.46645e-05	9.26937e-05
IGKV3-15	1.03242	2.47726	4.03825	6.64634e-05	9.51764e-05
DLK1	1.16213	1.24934	3.9788	8.45264e-05	0.000120103
IFI27	-1.00516	5.77992	-3.96222	9.03379e-05	0.000128066
IGLV1-47	1.04984	2.58062	3.9317	0.000102048	0.000144147
KRT7	1.01795	2.95586	3.91894	0.000107355	0.000151401
IGF2	1.63144	5.5397	3.86922	0.000130648	0.000183231
IGLV2-23	1.07324	2.8396	3.85423	0.000138559	0.000193855
CYP2E1	-1.50299	6.75241	-3.80038	0.00017089	0.000237489
IGLV1-44	1.01974	2.6939	3.79813	0.000172384	0.000239511
SLC22A7	-1.01743	6.44623	-3.75796	0.000201239	0.000277849
IGLV1-40	1.06555	3.0037	3.69932	0.000251651	0.000345493
IGLC2	1.13746	4.96431	3.66339	0.000288178	0.000393827
IGHA1	1.04623	5.62286	3.63404	0.00032167	0.000438173
IGLV3-19	1.04357	2.99502	3.52189	0.000486364	0.000653468
HGFAC	-1.04937	4.17142	-3.4273	0.000683656	0.000909427
DEFB1	1.10735	7.17749	3.28237	0.00113519	0.00148697
