# Supplementary material for: A Necroptosis-Related Gene Signature for Predicting Prognosis, Immune Landscape, and Therapy Sensitivity in Hepatocellular Carcinoma
Source: Research Square preprint supplement (doi:10.21203/rs.3.rs-1201594/v1), 2022-01-03
Supplement: Supplementary file 2 [file ab604c9f6ed623a8d76e1be2.xlsx]

## Sheet: Sheet1
ID	HR	HR.95L	HR.95H	p value
TYRO3	1.27829	1.07519	1.51975	0.00541681
PLXNA1	1.54185	1.22224	1.94504	0.000259012
YEATS2	2.35607	1.64822	3.36792	2.58814e-06
MAPRE1	1.49642	1.15425	1.94001	0.00234267
SPATS2	2.10722	1.52865	2.90476	5.3315e-06
MPZL1	1.7069	1.30349	2.23518	0.000101694
PHF21A	1.65978	1.21749	2.26275	0.00135261
CPSF6	2.90317	1.86362	4.52259	2.4479e-06
STX6	1.87966	1.26941	2.78328	0.00162671
SMARCD1	2.31486	1.5302	3.50187	7.06313e-05
GIT1	1.80007	1.30741	2.47838	0.000314711
CASP2	2.23008	1.45967	3.40711	0.000208088
PNMA1	1.3582	1.12278	1.64298	0.00161964
RIT1	1.91853	1.43429	2.56626	1.13284e-05
RNF24	1.84013	1.32113	2.56302	0.000309492
GTSE1	1.70301	1.36698	2.12165	2.05895e-06
MTMR2	2.15539	1.58539	2.93033	9.55243e-07
RBM12	1.75753	1.15938	2.66428	0.00789165
CNOT6	2.09709	1.44699	3.03926	9.16859e-05
ZNF532	1.41616	1.10757	1.81073	0.00552451
NUP62	1.85283	1.29468	2.65161	0.000745939
NCAPD2	1.68947	1.31475	2.17099	4.15329e-05
LIMK1	1.48887	1.16945	1.89555	0.00123624
MMD	1.29733	1.08635	1.5493	0.00404628
DYRK2	1.63524	1.19817	2.23175	0.00193933
CDCA4	1.74622	1.34023	2.27518	3.64259e-05
ARHGEF2	1.41488	1.13099	1.77003	0.00238715
AACS	1.45944	1.12938	1.88596	0.0038516
LMNB2	1.7848	1.39474	2.28395	4.1387e-06
ECT2	1.45399	1.2285	1.72087	1.33974e-05
CSNK1E	1.50694	1.11383	2.03879	0.00783764
CEP55	1.69775	1.41303	2.03984	1.59211e-08
SLC27A5	0.840217	0.769795	0.917082	9.69824e-05
GPD2	1.96953	1.3979	2.77492	0.000106623
BUB1B	1.47072	1.23183	1.75593	1.99503e-05
KIF23	1.59977	1.30503	1.96109	6.11499e-06
CENPF	1.39413	1.16148	1.67339	0.0003612
TCF3	1.64626	1.16334	2.32966	0.00489325
BAK1	1.40603	1.10293	1.79242	0.00594405
CENPO	1.85668	1.39654	2.46842	2.05744e-05
UBAP2L	1.74209	1.25669	2.41499	0.000865094
CKAP4	1.31367	1.088	1.58615	0.00455431
WDHD1	2.11864	1.55424	2.88799	2.03435e-06
NAP1L1	1.52544	1.20048	1.93837	0.00055052
CORO1C	1.53234	1.17589	1.99684	0.00158137
NCAPH	1.50721	1.21931	1.86309	0.00014863
B4GALT5	1.51149	1.20297	1.89913	0.000390461
NDRG3	1.5676	1.16935	2.10149	0.00264565
POGK	1.57569	1.21198	2.04853	0.000684181
CBX1	1.55189	1.17239	2.05425	0.00212982
INCENP	1.63126	1.21535	2.1895	0.001119
GLS	1.32211	1.07789	1.62168	0.00736754
NUP205	2.37285	1.61101	3.49495	1.22201e-05
POLA1	1.92097	1.38444	2.66542	9.36226e-05
PRKCD	1.59772	1.24264	2.05427	0.000258221
KIF11	1.52027	1.24067	1.86288	5.3528e-05
BUB1	1.68472	1.34265	2.11394	6.6536e-06
ACTL6A	1.59125	1.20891	2.0945	0.000922618
ITPR3	1.24855	1.06521	1.46344	0.00615043
SMARCC1	1.64344	1.15387	2.34074	0.00590362
FUBP1	1.99756	1.43859	2.77372	3.60702e-05
TOPBP1	1.67996	1.25123	2.25558	0.00055875
B3GALNT1	1.54531	1.19487	1.99854	0.000910741
FZD1	1.33989	1.08818	1.64983	0.00585223
CHAF1B	1.43057	1.14782	1.78298	0.00143758
DNMT1	1.43783	1.12893	1.83123	0.00325329
KIF18A	2.01624	1.55566	2.61318	1.15987e-07
BTBD3	1.36728	1.09352	1.70957	0.00606512
GINS1	1.46297	1.23653	1.73087	9.22605e-06
TMEM165	1.57493	1.17576	2.10962	0.00232183
YWHAZ	1.48544	1.19092	1.85281	0.000448812
POLD1	1.64426	1.22369	2.20938	0.000969316
NCDN	1.64963	1.23159	2.20957	0.000788034
HOMER3	1.29526	1.07832	1.55585	0.0056709
PTPN12	1.75163	1.24254	2.46932	0.00137716
PLK1	1.62437	1.33101	1.98238	1.80885e-06
TOP2A	1.27583	1.12098	1.45206	0.000224402
MCM6	1.56521	1.28057	1.91313	1.21533e-05
BCOR	1.67848	1.2236	2.30247	0.00132168
MARCKS	1.4046	1.14447	1.72385	0.0011487
CENPE	1.84988	1.45565	2.35088	4.89688e-07
STIL	1.58831	1.21528	2.07584	0.00070526
EZH2	1.79813	1.40461	2.3019	3.22206e-06
MSH2	1.66557	1.26448	2.19387	0.000284075
FOXM1	1.3962	1.17484	1.65928	0.000151026
BCORL1	1.69166	1.27628	2.24223	0.000255252
RACGAP1	1.56595	1.27258	1.92696	2.26203e-05
PRR11	1.61451	1.33654	1.95029	6.73103e-07
ARHGAP11A	1.48788	1.17758	1.87995	0.000869243
STX3	1.58725	1.24905	2.01702	0.000157479
NEK2	1.37139	1.15365	1.63024	0.000343362
PLXNA3	1.37998	1.08066	1.76221	0.00982942
KIF20A	1.64594	1.36823	1.98003	1.25575e-07
IMPDH1	1.53067	1.28318	1.82589	2.2345e-06
KIF14	1.49485	1.18845	1.88024	0.000592073
KNTC1	1.40305	1.13777	1.73019	0.00154045
ITGA5	1.36385	1.1053	1.68289	0.00380968
ATP1A1	1.34447	1.14805	1.5745	0.000239413
YWHAQ	1.63703	1.25943	2.12785	0.000229607
MMP14	1.22357	1.05235	1.42266	0.00870819
WDR62	1.54272	1.1906	1.999	0.00103941
HMGA1	1.43395	1.20048	1.71283	7.03509e-05
MYBL2	1.35873	1.1929	1.54762	3.91372e-06
FHL3	1.54408	1.1853	2.01145	0.00128193
ABCC1	1.35668	1.13639	1.61968	0.000740182
CALU	1.53554	1.18602	1.98806	0.00113558
MCM3	1.40536	1.14492	1.72504	0.00113752
PPT1	1.64228	1.28702	2.09562	6.64117e-05
MKI67	1.45252	1.21286	1.73953	4.95781e-05
CCNF	1.77753	1.3444	2.3502	5.41536e-05
PRC1	1.31177	1.11132	1.54837	0.00133912
LHFPL2	1.41875	1.15369	1.74471	0.000916867
ATP13A2	1.85004	1.37339	2.49211	5.18161e-05
NT5DC2	1.36087	1.17388	1.57765	4.39561e-05
CDC6	1.40825	1.17834	1.68302	0.000166917
TPX2	1.53616	1.30089	1.81397	4.16039e-07
TTK	1.6225	1.35082	1.94882	2.26463e-07
KIF3C	1.50369	1.18166	1.91348	0.000908499
KIF2C	1.64309	1.3718	1.96804	6.91636e-08
NUP210	1.46045	1.12597	1.89428	0.00431718
FANCE	1.69582	1.29392	2.22255	0.000129664
CDCA8	1.72811	1.42262	2.09921	3.55713e-08
FBXO5	1.78237	1.36686	2.32421	1.97606e-05
TRIP13	1.61055	1.35382	1.91596	7.47836e-08
MARCKSL1	1.40818	1.2078	1.64179	1.23802e-05
GTPBP2	1.44333	1.09437	1.90357	0.00936243
MAD2L1	1.49234	1.22502	1.81799	7.03051e-05
MCM10	1.86554	1.47982	2.3518	1.31859e-07
RFC4	1.42951	1.16669	1.75154	0.000566198
CHEK1	1.74957	1.32321	2.31332	8.66727e-05
KCTD17	1.27684	1.08758	1.49904	0.00283005
CDK4	1.63064	1.28969	2.06173	4.39521e-05
LAMB1	1.28849	1.11414	1.49011	0.000632835
MCM2	1.43362	1.21201	1.69576	2.62018e-05
HELLS	1.36055	1.10222	1.67943	0.00415888
MCM4	1.49455	1.20788	1.84925	0.000217112
CENPA	1.68142	1.38755	2.03753	1.14685e-07
RUSC1	1.47777	1.13336	1.92684	0.00391866
SLC1A5	1.43082	1.25478	1.63155	8.87426e-08
HPR	0.89819	0.834841	0.966345	0.0040103
MFAP2	1.31615	1.11534	1.55311	0.0011447
EXO1	1.58929	1.26615	1.99489	6.47568e-05
MELK	1.49384	1.25249	1.78169	8.04098e-06
LMNB1	1.43157	1.18534	1.72896	0.000194907
TACC3	1.46823	1.20547	1.78825	0.000134842
CCNB2	1.30954	1.10471	1.55234	0.00188717
DSG2	1.23283	1.09118	1.39287	0.00077611
KIFC1	1.42129	1.19206	1.6946	8.93679e-05
CDC7	1.54438	1.25153	1.90577	5.09177e-05
TROAP	1.38942	1.15654	1.6692	0.000441821
SLC7A1	1.35353	1.12146	1.63364	0.00160811
FEN1	1.44221	1.17029	1.77731	0.000592083
USP1	1.66728	1.26238	2.20205	0.000316386
GLYAT	0.903052	0.835955	0.975534	0.00963148
CHML	1.46189	1.17294	1.82202	0.000725797
RIBC2	1.552	1.25457	1.91993	5.13591e-05
PTK7	1.27539	1.07945	1.50689	0.00425998
ADAM9	1.38327	1.16297	1.6453	0.000246562
DDX11	1.44769	1.13665	1.84385	0.0027194
WASF1	1.47662	1.18282	1.84339	0.0005747
NCAPG2	1.54937	1.21014	1.98369	0.00051509
RAD51AP1	1.37865	1.14336	1.66237	0.000770843
CCNB1	1.49061	1.26366	1.75833	2.17167e-06
SMC4	1.43675	1.16319	1.77464	0.000771782
NPAS2	1.51205	1.1726	1.94978	0.00143563
S100A11	1.19132	1.07174	1.32425	0.00117957
KIF4A	1.41514	1.20408	1.66319	2.51286e-05
SMOX	1.48378	1.23644	1.7806	2.22448e-05
NCAPG	1.59025	1.30913	1.93174	2.95411e-06
TMCO3	1.37241	1.11295	1.69235	0.00306754
TAT	0.893551	0.835585	0.955538	0.00100538
RAD51	1.46783	1.1518	1.87057	0.00191977
GPD1L	1.36434	1.11479	1.66976	0.00257557
RAD54L	1.57566	1.27637	1.94514	2.33339e-05
STK39	1.21638	1.05852	1.39779	0.0057471
ASPM	1.27173	1.09013	1.48359	0.00223098
DTL	1.25557	1.07195	1.47064	0.00478417
PLAUR	1.26191	1.06455	1.49586	0.00734424
SHCBP1	1.55683	1.25426	1.93239	5.95501e-05
CLIC1	1.40128	1.17068	1.6773	0.00023524
CDCA3	1.52639	1.23757	1.88261	7.76244e-05
ASF1B	1.33711	1.11132	1.60876	0.00208045
ZNF239	1.54324	1.29135	1.84427	1.8225e-06
ANXA5	1.35462	1.14923	1.59671	0.000297003
AURKB	1.34016	1.1246	1.59703	0.00106635
PAQR4	1.41338	1.16936	1.70834	0.000346433
CHST1	1.35767	1.11394	1.65472	0.00245525
MID1IP1	1.30579	1.07934	1.57975	0.00603833
OLFML2B	1.29493	1.09141	1.5364	0.00305024
CDC25A	1.53276	1.23631	1.90029	9.84796e-05
FZD7	1.52237	1.2724	1.82145	4.38252e-06
ZWINT	1.41116	1.19665	1.66411	4.24088e-05
PAFAH1B3	1.25324	1.0707	1.46689	0.00494527
EGLN3	1.38102	1.207	1.58012	2.62974e-06
OIP5	1.32013	1.07871	1.6156	0.00703543
CNTNAP1	1.47375	1.18117	1.83879	0.000593391
SCRN1	1.28481	1.1153	1.48009	0.000517361
CDC20	1.44543	1.26064	1.65731	1.30089e-07
RGS2	1.16756	1.04902	1.29949	0.00456747
RAP2A	1.45842	1.15852	1.83594	0.00131466
PFKFB3	1.17173	1.03929	1.32105	0.0096052
CKAP2	1.41042	1.14082	1.74374	0.00148745
MCM5	1.44853	1.14374	1.83454	0.00211062
PBK	1.42647	1.2162	1.6731	1.2684e-05
DCK	1.47808	1.13359	1.92727	0.00390069
SEC14L2	0.817083	0.733702	0.90994	0.000234641
CAPG	1.2038	1.06559	1.35994	0.00287274
ITGAV	1.29585	1.10161	1.52434	0.00176068
SLC10A1	0.879312	0.825193	0.936979	7.23427e-05
ATP1B3	1.40087	1.187	1.65329	6.66223e-05
MCM7	1.45582	1.18511	1.78837	0.000346254
PRKDC	1.58929	1.22698	2.05859	0.000448954
ENO2	1.22749	1.06482	1.41501	0.00471551
GYS2	0.881624	0.812738	0.95635	0.00240395
CENPM	1.33944	1.14221	1.57072	0.000323078
RASA3	1.35211	1.08398	1.68656	0.0074726
SERPINC1	0.918037	0.860747	0.97914	0.00929108
IGSF3	1.35591	1.1695	1.57203	5.46142e-05
CA5A	0.787856	0.675607	0.918754	0.0023619
RAP1GAP	1.305	1.12997	1.50715	0.000291353
HMGB2	1.3202	1.1009	1.58318	0.00272533
ESPL1	1.43995	1.1666	1.77735	0.000687256
SLC38A1	1.28592	1.13059	1.46259	0.000128845
E2F8	1.37946	1.12426	1.69258	0.00205482
CREB3L1	1.23578	1.0602	1.44043	0.006776
G6PD	1.45685	1.2877	1.64823	2.29407e-09
CDKN3	1.25692	1.08038	1.46229	0.00306428
DNM1	1.28902	1.06967	1.55333	0.00763682
PKMYT1	1.37862	1.10655	1.7176	0.00420167
UAP1L1	1.3731	1.17337	1.60682	7.70061e-05
CLCF1	1.3278	1.0874	1.62135	0.00539979
PSRC1	1.88149	1.47466	2.40057	3.68322e-07
AQP9	0.892331	0.832774	0.956148	0.00122775
PLP2	1.20346	1.04898	1.38068	0.00823635
TFDP1	1.41914	1.13107	1.78057	0.00249494
CDO1	0.884091	0.821425	0.951538	0.0010224
WDR76	1.36333	1.09449	1.69822	0.00568127
CA9	1.15227	1.06683	1.24455	0.000311157
RAB3IL1	1.35167	1.11974	1.63164	0.00170405
BIRC5	1.39558	1.19353	1.63185	2.95352e-05
IGF2BP3	1.25442	1.10206	1.42785	0.000601521
ALDOA	1.39379	1.20161	1.6167	1.15332e-05
ST6GALNAC4	1.57687	1.26184	1.97056	6.19734e-05
C8A	0.892757	0.82085	0.970962	0.00810316
RRM2	1.34951	1.15524	1.57645	0.000157024
ASNS	1.2356	1.07924	1.41461	0.00217931
CCNA2	1.34953	1.16062	1.56918	9.78028e-05
TYMS	1.32141	1.09737	1.59119	0.00327949
GPT	0.814094	0.722765	0.916963	0.000704402
CYP4F2	0.885834	0.812333	0.965986	0.00608812
MASP2	0.875313	0.801507	0.955915	0.00304524
STMN1	1.50967	1.24435	1.83157	2.95533e-05
CDT1	1.38841	1.16248	1.65826	0.000292956
ANXA2P2	1.39333	1.13684	1.70768	0.00139545
PFKP	1.23178	1.09985	1.37954	0.000310423
RDH16	0.866418	0.799204	0.939284	0.000500913
F12	0.884243	0.810721	0.964433	0.0054756
ADH1B	0.871547	0.812563	0.934812	0.000120384
SLC25A24	1.4564	1.21681	1.74316	4.13507e-05
HAO1	0.873103	0.808462	0.942913	0.000544751
CKS2	1.52814	1.26911	1.84004	7.64936e-06
LAPTM4B	1.32507	1.1485	1.52879	0.000114548
ASRGL1	1.24986	1.07985	1.44663	0.00279208
TM6SF2	0.830075	0.72484	0.950589	0.00708999
PLOD2	1.59102	1.3007	1.94614	6.25682e-06
TMSB10	1.18554	1.05581	1.33121	0.0039965
GNAZ	1.21016	1.05751	1.38485	0.00555778
HAAO	0.806967	0.699335	0.931164	0.00332013
CDC25B	1.48857	1.21146	1.82908	0.000153638
CYP26B1	1.40484	1.19881	1.64627	2.658e-05
PTGES	1.1717	1.04224	1.31724	0.00798774
CSF1	1.39766	1.13203	1.72562	0.00185155
HK2	1.24676	1.09579	1.41854	0.000811237
EIF5A2	1.31847	1.08207	1.6065	0.00609893
IER3	1.17443	1.04641	1.31812	0.00632734
ETV4	1.19409	1.06844	1.33451	0.00176651
ANXA2	1.29316	1.08837	1.53649	0.00347048
SLC22A1	0.888198	0.832592	0.947518	0.00032529
NDRG1	1.34882	1.16759	1.55819	4.81131e-05
PTTG1	1.37647	1.17486	1.61267	7.67618e-05
HMMR	1.46535	1.22287	1.75591	3.47428e-05
PIPOX	0.877727	0.801648	0.961025	0.00481183
CYP4A11	0.89275	0.822043	0.969538	0.00704336
SULT2A1	0.90867	0.851354	0.969844	0.00396325
C6	0.855136	0.78447	0.932167	0.000376342
LOX	1.30123	1.09643	1.54429	0.00258201
CXCL5	1.18635	1.07783	1.30579	0.000480446
EPS8L3	1.17845	1.05659	1.31436	0.00319328
PCK1	0.912828	0.851825	0.978198	0.00974926
RGN	0.812754	0.730101	0.904764	0.000151257
MMP10	1.27167	1.07592	1.50304	0.00483356
RECQL4	1.34666	1.11827	1.6217	0.001696
BHMT	0.894727	0.832873	0.961175	0.00233955
CFHR4	0.818452	0.75175	0.891073	3.85719e-06
E2F1	1.26165	1.08103	1.47245	0.00319483
SEMA6A	1.29838	1.10439	1.52643	0.00156336
BAAT	0.884748	0.810921	0.965297	0.00587912
CYP27A1	0.811179	0.725055	0.907532	0.000257935
MMP7	1.11966	1.03518	1.21104	0.00474469
HPX	0.872343	0.8064	0.943678	0.0006605
MMP1	1.45798	1.26883	1.67533	1.04745e-07
CTSC	1.26805	1.0921	1.47235	0.00183404
DAO	0.871505	0.786774	0.96536	0.0084008
GCNT3	1.238	1.0852	1.41232	0.00149109
MMP12	1.14621	1.04982	1.25145	0.00232925
HSD17B6	0.896536	0.835709	0.96179	0.00231293
AR	0.806078	0.698592	0.930102	0.00315378
CYP2C9	0.848298	0.787701	0.913557	1.35585e-05
CFHR2	0.862428	0.784689	0.947869	0.00213484
BDH1	0.770578	0.689747	0.860881	4.03763e-06
TREM2	1.20126	1.05134	1.37254	0.00701492
CTH	0.883144	0.80391	0.970186	0.00956826
AKR7A3	0.867653	0.79583	0.945957	0.001281
SLC2A1	1.53025	1.3146	1.78129	4.03763e-08
PROZ	0.866201	0.779967	0.961969	0.00726069
AGXT	0.899888	0.835808	0.96888	0.00512991
ITIH1	0.887379	0.818573	0.961969	0.00371344
PON3	0.840296	0.75661	0.933238	0.00115053
CPB2	0.864982	0.793565	0.942826	0.000970258
BAIAP2L2	1.21223	1.06524	1.3795	0.00352068
CPS1	0.90088	0.848852	0.956097	0.000583453
PON1	0.848247	0.786927	0.914345	1.71604e-05
BAMBI	1.21379	1.07147	1.375	0.00232757
POF1B	1.24458	1.09321	1.41692	0.000943605
ADH6	0.874333	0.793051	0.963946	0.00698498
UPB1	0.83875	0.772108	0.911144	3.14107e-05
NR1I2	0.854327	0.76364	0.955784	0.00596268
CYP3A4	0.921071	0.86876	0.976532	0.00585131
LGALS3	1.19892	1.06819	1.34564	0.0020716
PHLDA2	1.24458	1.0952	1.41433	0.000796628
CPN2	0.887662	0.812364	0.969939	0.00841797
ABCA6	0.830482	0.735229	0.938075	0.00280419
PFN2	1.27412	1.14009	1.42391	1.938e-05
SRD5A2	0.830337	0.733948	0.939385	0.00314529
EHHADH	0.838255	0.748697	0.938526	0.00220948
ABAT	0.843015	0.754341	0.942114	0.0025994
AGR2	1.1046	1.03066	1.18383	0.0048866
C8B	0.888778	0.814811	0.969461	0.00782463
FTCD	0.84711	0.781161	0.918626	6.00809e-05
UCHL1	1.12894	1.0401	1.22536	0.00372867
MYRIP	0.850345	0.756294	0.956092	0.0067125
LECT2	0.874805	0.816562	0.937202	0.000141832
AFM	0.857694	0.798791	0.920941	2.34983e-05
KNG1	0.891673	0.829561	0.958435	0.00185588
GADD45G	0.801434	0.70618	0.909536	0.000606408
SPP2	0.865257	0.810008	0.924274	1.71489e-05
MSC	1.20269	1.09342	1.32287	0.000146061
F13B	0.856086	0.788345	0.929648	0.000220402
FMO3	0.876469	0.813938	0.943804	0.000480374
GNMT	0.881281	0.815418	0.952465	0.00142848
ANXA10	0.790359	0.712384	0.876868	9.0218e-06
FLNC	1.18862	1.06424	1.32755	0.00218521
FABP4	0.855792	0.766143	0.955932	0.00581186
ADH1A	0.889846	0.827942	0.956379	0.00151236
HRG	0.905932	0.852892	0.962272	0.00133041
MEP1A	1.15051	1.05292	1.25715	0.00193458
LCAT	0.734486	0.639227	0.843942	1.33722e-05
OGDHL	0.842689	0.761016	0.933128	0.000999548
SLC2A2	0.852225	0.790232	0.919082	3.32848e-05
S100A9	1.25477	1.14298	1.3775	1.87125e-06
C4BPA	0.883843	0.820804	0.951725	0.0010734
ALDH8A1	0.872371	0.792785	0.959948	0.00515097
TFF2	1.15001	1.04262	1.26846	0.0052001
SERPINE1	1.14897	1.03905	1.27051	0.00679521
SPP1	1.14749	1.08454	1.21409	1.76187e-06
SLC38A4	0.898055	0.829161	0.972674	0.00828287
GPLD1	0.820585	0.732182	0.919661	0.000673874
VNN2	1.15756	1.04167	1.28635	0.00656002
CYP7A1	0.892634	0.833547	0.955911	0.00115255
UGT2B15	0.874152	0.810435	0.942879	0.00049551
G6PC	0.873845	0.814049	0.938034	0.000192417
AKR1D1	0.891119	0.822632	0.965307	0.00472282
CFHR5	0.903508	0.843907	0.967318	0.00356512
SFN	1.15584	1.06323	1.25652	0.000677077
SLC22A7	0.880234	0.818115	0.94707	0.000634606
HGFAC	0.902665	0.84182	0.967909	0.00402704
