# Supplementary material for: A Necroptosis-Related Gene Signature for Predicting Prognosis, Immune Landscape, and Therapy Sensitivity in Hepatocellular Carcinoma
Source: Research Square preprint supplement (doi:10.21203/rs.3.rs-1201594/v1), 2022-01-03
Supplement: Supplementary file 3 [file d5c0801236058c80442edc93.xlsx]

## Sheet: Sheet1
ID	logFC	AveExpr	t	P.Value	adj.P.Val
KEGG_PRIMARY_BILE_ACID_BIOSYNTHESIS	-1.10854	0.0241066	-16.5403	8.0469e-46	1.49672e-43
KEGG_RETINOL_METABOLISM	-0.845539	0.0169017	-15.6983	2.00405e-42	1.86377e-40
KEGG_DRUG_METABOLISM_CYTOCHROME_P450	-0.828194	0.0103476	-15.3209	6.53049e-41	4.0489e-39
KEGG_PATHOGENIC_ESCHERICHIA_COLI_INFECTION	0.609396	-0.0314441	14.4478	1.93643e-37	8.84524e-36
KEGG_METABOLISM_OF_XENOBIOTICS_BY_CYTOCHROME_P450	-0.764001	0.00330774	-14.4252	2.37775e-37	8.84524e-36
KEGG_RENAL_CELL_CARCINOMA	0.652489	-0.0281901	14.1367	3.25468e-36	9.85596e-35
KEGG_GLYCINE_SERINE_AND_THREONINE_METABOLISM	-0.849113	0.0155125	-14.1222	3.70923e-36	9.85596e-35
KEGG_NOTCH_SIGNALING_PATHWAY	0.651442	-0.0256016	14.0625	6.36334e-36	1.47948e-34
KEGG_STEROID_HORMONE_BIOSYNTHESIS	-0.706413	0.0129655	-13.9585	1.62735e-35	3.3632e-34
KEGG_CELL_CYCLE	0.717632	-0.0363623	13.6173	3.48708e-34	6.48598e-33
KEGG_PPAR_SIGNALING_PATHWAY	-0.60534	0.0058252	-13.5714	5.25535e-34	8.88633e-33
KEGG_TRYPTOPHAN_METABOLISM	-0.741242	-0.00295866	-13.5281	7.73913e-34	1.19957e-32
KEGG_PROGESTERONE_MEDIATED_OOCYTE_MATURATION	0.556134	-0.0260867	13.4463	1.60624e-33	2.29816e-32
KEGG_SPLICEOSOME	0.79664	-0.0317506	13.394	2.55964e-33	3.40067e-32
KEGG_ENDOCYTOSIS	0.535134	-0.0285253	13.3099	5.40875e-33	6.70684e-32
KEGG_OOCYTE_MEIOSIS	0.523772	-0.0294265	13.292	6.34416e-33	7.37509e-32
KEGG_TYROSINE_METABOLISM	-0.582634	-0.0103001	-13.1111	3.15209e-32	3.44876e-31
KEGG_FC_GAMMA_R_MEDIATED_PHAGOCYTOSIS	0.634178	-0.0261733	12.9028	1.98006e-31	2.04606e-30
KEGG_VASOPRESSIN_REGULATED_WATER_REABSORPTION	0.592002	-0.039494	12.7067	1.1061e-30	1.08281e-29
KEGG_NEUROTROPHIN_SIGNALING_PATHWAY	0.568851	-0.0269533	12.6995	1.17848e-30	1.09599e-29
KEGG_BLADDER_CANCER	0.510564	-0.0334053	12.6676	1.55806e-30	1.38e-29
KEGG_FATTY_ACID_METABOLISM	-0.839218	0.00913378	-12.5899	3.06853e-30	2.5943e-29
KEGG_UBIQUITIN_MEDIATED_PROTEOLYSIS	0.639341	-0.0297406	12.5243	5.4367e-30	4.39663e-29
KEGG_MTOR_SIGNALING_PATHWAY	0.531937	-0.0327943	12.1694	1.17383e-28	8.86658e-28
KEGG_PANCREATIC_CANCER	0.588889	-0.0289416	12.1677	1.19175e-28	8.86658e-28
KEGG_INOSITOL_PHOSPHATE_METABOLISM	0.60374	-0.0285591	12.1495	1.3933e-28	9.96743e-28
KEGG_ARGININE_AND_PROLINE_METABOLISM	-0.536535	-0.0132724	-12.1427	1.4773e-28	1.0177e-27
KEGG_RNA_DEGRADATION	0.631107	-0.0393377	12.1357	1.56863e-28	1.04202e-27
KEGG_CHRONIC_MYELOID_LEUKEMIA	0.596753	-0.0311046	12.1136	1.89717e-28	1.21681e-27
KEGG_ERBB_SIGNALING_PATHWAY	0.515923	-0.0288476	12.0685	2.79372e-28	1.73211e-27
KEGG_PHOSPHATIDYLINOSITOL_SIGNALING_SYSTEM	0.575286	-0.0247392	11.8947	1.23655e-27	7.41931e-27
KEGG_PATHWAYS_IN_CANCER	0.473695	-0.0218978	11.7917	2.9723e-27	1.72765e-26
KEGG_LINOLEIC_ACID_METABOLISM	-0.559485	-0.00318544	-11.7868	3.09947e-27	1.74697e-26
KEGG_GNRH_SIGNALING_PATHWAY	0.452771	-0.0255561	11.6891	7.09716e-27	3.88257e-26
KEGG_HOMOLOGOUS_RECOMBINATION	0.738852	-0.048111	11.6484	1.00147e-26	5.32209e-26
KEGG_BUTANOATE_METABOLISM	-0.685341	0.00700546	-11.5736	1.88427e-26	9.73542e-26
KEGG_DRUG_METABOLISM_OTHER_ENZYMES	-0.586155	-0.00309622	-11.4427	5.66863e-26	2.84963e-25
KEGG_REGULATION_OF_ACTIN_CYTOSKELETON	0.471164	-0.02144	11.4052	7.75738e-26	3.79703e-25
KEGG_PURINE_METABOLISM	0.344299	-0.0328814	11.3855	9.15149e-26	4.36456e-25
KEGG_WNT_SIGNALING_PATHWAY	0.451431	-0.0317264	11.3591	1.14148e-25	5.3079e-25
KEGG_NON_HOMOLOGOUS_END_JOINING	0.71685	-0.0449954	11.2076	4.03701e-25	1.83142e-24
KEGG_GAP_JUNCTION	0.480274	-0.0188109	11.165	5.75025e-25	2.50251e-24
KEGG_BETA_ALANINE_METABOLISM	-0.701963	0.00401463	-11.1643	5.78538e-25	2.50251e-24
KEGG_SMALL_CELL_LUNG_CANCER	0.532408	-0.0271078	11.1344	7.41128e-25	3.13295e-24
KEGG_COLORECTAL_CANCER	0.551591	-0.0271717	11.1147	8.72686e-25	3.6071e-24
KEGG_VIBRIO_CHOLERAE_INFECTION	0.472916	-0.0339993	11.112	8.92263e-25	3.60784e-24
KEGG_MAPK_SIGNALING_PATHWAY	0.415581	-0.0179346	11.0866	1.10093e-24	4.35687e-24
KEGG_AXON_GUIDANCE	0.481061	-0.015116	11.019	1.92503e-24	7.4595e-24
KEGG_EPITHELIAL_CELL_SIGNALING_IN_HELICOBACTER_PYLORI_INFECTION	0.481736	-0.033248	10.9066	4.85253e-24	1.84198e-23
KEGG_NITROGEN_METABOLISM	-0.480517	-0.0150683	-10.8673	6.69755e-24	2.49149e-23
KEGG_PHENYLALANINE_METABOLISM	-0.566593	-0.00270108	-10.822	9.70462e-24	3.53933e-23
KEGG_VEGF_SIGNALING_PATHWAY	0.398534	-0.027821	10.8025	1.13812e-23	4.07096e-23
KEGG_NON_SMALL_CELL_LUNG_CANCER	0.467419	-0.0326998	10.6684	3.39559e-23	1.19166e-22
KEGG_THYROID_CANCER	0.47999	-0.046579	10.6021	5.81049e-23	2.00139e-22
KEGG_HISTIDINE_METABOLISM	-0.511682	-0.016627	-10.5427	9.39314e-23	3.17659e-22
KEGG_LONG_TERM_POTENTIATION	0.416124	-0.020725	10.491	1.42494e-22	4.73284e-22
KEGG_ADHERENS_JUNCTION	0.52028	-0.0285726	10.4857	1.48721e-22	4.85301e-22
KEGG_COMPLEMENT_AND_COAGULATION_CASCADES	-0.682496	0.015916	-10.4157	2.61026e-22	8.37082e-22
KEGG_MISMATCH_REPAIR	0.716177	-0.042274	10.2716	8.26188e-22	2.60459e-21
KEGG_NUCLEOTIDE_EXCISION_REPAIR	0.600798	-0.042327	10.2602	9.04411e-22	2.80367e-21
KEGG_ALANINE_ASPARTATE_AND_GLUTAMATE_METABOLISM	-0.47498	-0.0115381	-10.0931	3.40278e-21	1.03757e-20
KEGG_ACUTE_MYELOID_LEUKEMIA	0.485623	-0.0260268	10.0663	4.20446e-21	1.26134e-20
KEGG_DNA_REPLICATION	0.764487	-0.034006	10.0555	4.57822e-21	1.35167e-20
KEGG_MELANOGENESIS	0.381811	-0.02717	10.0192	6.08886e-21	1.76957e-20
KEGG_PEROXISOME	-0.548588	-0.00838503	-9.94609	1.0811e-20	3.09362e-20
KEGG_BASAL_TRANSCRIPTION_FACTORS	0.523304	-0.03493	9.90157	1.53145e-20	4.31591e-20
KEGG_SNARE_INTERACTIONS_IN_VESICULAR_TRANSPORT	0.460122	-0.0412665	9.84675	2.34872e-20	6.52032e-20
KEGG_GLIOMA	0.405781	-0.0281886	9.75117	4.93548e-20	1.35e-19
KEGG_GLYCOSAMINOGLYCAN_BIOSYNTHESIS_CHONDROITIN_SULFATE	0.528182	-0.0274507	9.72727	5.93839e-20	1.60078e-19
KEGG_TGF_BETA_SIGNALING_PATHWAY	0.432542	-0.0316498	9.72147	6.21104e-20	1.65036e-19
KEGG_PROSTATE_CANCER	0.433758	-0.0261389	9.61828	1.37643e-19	3.60587e-19
KEGG_DORSO_VENTRAL_AXIS_FORMATION	0.552054	-0.0104446	9.60675	1.504e-19	3.88532e-19
KEGG_GLYCOSAMINOGLYCAN_BIOSYNTHESIS_KERATAN_SULFATE	0.465742	-0.0381149	9.32347	1.30182e-18	3.31697e-18
KEGG_VALINE_LEUCINE_AND_ISOLEUCINE_DEGRADATION	-0.681917	-0.00366036	-9.27115	1.9315e-18	4.85486e-18
KEGG_PROPANOATE_METABOLISM	-0.631904	-0.0133185	-9.25115	2.24517e-18	5.56803e-18
KEGG_RIG_I_LIKE_RECEPTOR_SIGNALING_PATHWAY	0.38204	-0.0198056	9.2492	2.27841e-18	5.57611e-18
KEGG_GLYCOSAMINOGLYCAN_BIOSYNTHESIS_HEPARAN_SULFATE	0.396017	-0.0190803	9.22007	2.83571e-18	6.84991e-18
KEGG_LIMONENE_AND_PINENE_DEGRADATION	-0.69521	-0.00779308	-9.03635	1.1165e-17	2.66243e-17
KEGG_PENTOSE_AND_GLUCURONATE_INTERCONVERSIONS	-0.575274	0.00741325	-9.00312	1.42811e-17	3.36239e-17
KEGG_FOLATE_BIOSYNTHESIS	-0.499477	-0.00465366	-8.98475	1.63587e-17	3.80341e-17
KEGG_ASCORBATE_AND_ALDARATE_METABOLISM	-0.630874	0.0170196	-8.94105	2.25834e-17	5.18581e-17
KEGG_BASE_EXCISION_REPAIR	0.51889	-0.0461247	8.90815	2.87701e-17	6.5259e-17
KEGG_T_CELL_RECEPTOR_SIGNALING_PATHWAY	0.479293	-0.0272392	8.90057	3.0419e-17	6.8168e-17
KEGG_PYRUVATE_METABOLISM	-0.439608	-0.0211617	-8.83848	4.79568e-17	1.0619e-16
KEGG_LONG_TERM_DEPRESSION	0.323873	-0.016002	8.80528	6.11226e-17	1.33751e-16
KEGG_NOD_LIKE_RECEPTOR_SIGNALING_PATHWAY	0.463454	-0.028389	8.7433	9.60028e-17	2.07634e-16
KEGG_FOCAL_ADHESION	0.441225	-0.0203163	8.70406	1.27631e-16	2.72867e-16
KEGG_ARRHYTHMOGENIC_RIGHT_VENTRICULAR_CARDIOMYOPATHY_ARVC	0.416083	-0.0214136	8.58478	3.01853e-16	6.38008e-16
KEGG_TIGHT_JUNCTION	0.328137	-0.0254533	8.56462	3.48875e-16	7.29109e-16
KEGG_PYRIMIDINE_METABOLISM	0.35146	-0.0369853	8.45786	7.48241e-16	1.52937e-15
KEGG_N_GLYCAN_BIOSYNTHESIS	0.447881	-0.0380682	8.35505	1.55111e-15	3.13593e-15
KEGG_RIBOFLAVIN_METABOLISM	0.420581	-0.0448597	8.23749	3.54497e-15	7.08994e-15
KEGG_B_CELL_RECEPTOR_SIGNALING_PATHWAY	0.447251	-0.0232026	8.18207	5.22026e-15	1.03294e-14
KEGG_ENDOMETRIAL_CANCER	0.424893	-0.0288701	8.12909	7.54534e-15	1.4773e-14
KEGG_BASAL_CELL_CARCINOMA	0.352801	-0.0305301	8.10436	8.95659e-15	1.73534e-14
KEGG_ARACHIDONIC_ACID_METABOLISM	-0.331722	-0.0109237	-8.09299	9.68981e-15	1.85805e-14
KEGG_FC_EPSILON_RI_SIGNALING_PATHWAY	0.345108	-0.0286275	8.08995	9.89558e-15	1.87814e-14
KEGG_P53_SIGNALING_PATHWAY	0.315686	-0.0351618	8.06078	1.2105e-14	2.27427e-14
KEGG_AMINOACYL_TRNA_BIOSYNTHESIS	0.517198	-0.0416112	8.05309	1.2765e-14	2.37428e-14
KEGG_GLYCOLYSIS_GLUCONEOGENESIS	-0.345291	-0.0188656	-7.92049	3.16945e-14	5.83681e-14
KEGG_GLYCOSYLPHOSPHATIDYLINOSITOL_GPI_ANCHOR_BIOSYNTHESIS	0.460824	-0.0412899	7.91006	3.40299e-14	6.20546e-14
KEGG_TOLL_LIKE_RECEPTOR_SIGNALING_PATHWAY	0.387771	-0.0216516	7.83354	5.72247e-14	1.03338e-13
KEGG_HYPERTROPHIC_CARDIOMYOPATHY_HCM	0.386741	-0.0176676	7.81259	6.59364e-14	1.17925e-13
KEGG_GLYOXYLATE_AND_DICARBOXYLATE_METABOLISM	-0.41514	-0.0340413	-7.6981	1.42402e-13	2.52255e-13
KEGG_STARCH_AND_SUCROSE_METABOLISM	-0.387745	0.00237618	-7.65601	1.88618e-13	3.30972e-13
KEGG_SPHINGOLIPID_METABOLISM	0.322977	-0.0385667	7.56582	3.43268e-13	5.96709e-13
KEGG_RNA_POLYMERASE	0.417478	-0.0475989	7.31873	1.72648e-12	2.97338e-12
KEGG_HEDGEHOG_SIGNALING_PATHWAY	0.32861	-0.0313952	7.22652	3.12459e-12	5.2358e-12
KEGG_CYTOSOLIC_DNA_SENSING_PATHWAY	0.335247	-0.0142758	7.16143	4.73429e-12	7.86231e-12
KEGG_VALINE_LEUCINE_AND_ISOLEUCINE_BIOSYNTHESIS	0.458469	-0.0465791	6.97646	1.51961e-11	2.47936e-11
KEGG_LYSOSOME	0.335761	-0.0343135	6.93494	1.96836e-11	3.18361e-11
KEGG_DILATED_CARDIOMYOPATHY	0.364971	-0.0130205	6.91605	2.21358e-11	3.54936e-11
KEGG_PORPHYRIN_AND_CHLOROPHYLL_METABOLISM	-0.3848	-0.0114454	-6.78278	5.03274e-11	8.00076e-11
KEGG_CHEMOKINE_SIGNALING_PATHWAY	0.348627	-0.0242126	6.76474	5.61953e-11	8.8579e-11
KEGG_RENIN_ANGIOTENSIN_SYSTEM	-0.336505	-0.0187473	-6.62731	1.29285e-10	2.02076e-10
KEGG_LEUKOCYTE_TRANSENDOTHELIAL_MIGRATION	0.309269	-0.0184086	6.54116	2.16563e-10	3.35673e-10
KEGG_GLYCOSPHINGOLIPID_BIOSYNTHESIS_GLOBO_SERIES	0.348202	-0.0250399	6.4368	4.01837e-10	6.177e-10
KEGG_LEISHMANIA_INFECTION	0.402525	-0.0169107	5.80497	1.4434e-08	2.13137e-08
KEGG_PROTEIN_EXPORT	0.343894	-0.0452605	5.80492	1.44383e-08	2.13137e-08
KEGG_BIOSYNTHESIS_OF_UNSATURATED_FATTY_ACIDS	-0.302479	-0.0204988	-5.09824	5.62339e-07	7.8643e-07
